# Supplementary material
Source: publisher figshare collection journal article supplement (https://gsapubs.figshare.com/ndownloader/files/23303600)
Supplement: Supplementary file 1 [file 23303600]

Archive with 4 entries (4 files):
- DR Figure S1.pdf
- DR Supplemental Text.pdf
- DR Table S1 ArAr data Dalhousie.xlsx
- DR Table S2 ArAr data Freiberg.xlsx
