# Supplementary material
Source: publisher figshare collection journal article supplement (https://gsapubs.figshare.com/ndownloader/files/23303600)
Supplement: Supplementary file 1 [file 23303600 › DR Table S1 ArAr data Dalhousie.xlsx]

## Sheet: Dal
Stübner, K., Warren, C., Ratschbacher, L., Sperner, B., Kleeberg, R., Pfänder, J., and Grujic, D., 2017, Anomalously old biotite 40Ar/39Ar ages in the NW Himalaya: Lithosphere, doi:10.1130/L586.1.
Table S1. Analytical Results of 40Ar/39Ar Geochronology (Noble Gas Laboratory, Dalhousie).
803B3 MUSCOVITE ARGON SUMMARY (published in Stübner et al., 2014)
T°C	39Ar(mV)	39Ar(%)	AGE (Ma)	±1σ	% ATM	36Ar/40Ar	39Ar/40Ar	39Ar/40Ar * 100	±1σ	36Ar/40Ar * 1000	±1σ
750	15.8	0.7	57.2	13	93.2	0.003155	0.004906	0.491	0.002	3.155	0.054
800	81.3	3.7	47.3	7.1	89.4	0.003028	0.009265	0.926	0.006	3.028	0.052
825	223.8	10.3	35.3	2	77.5	0.002625	0.026599	2.659	0.014	2.625	0.041
850	182.6	8.4	35.5	2.3	79.7	0.002697	0.023935	2.393	0.014	2.697	0.043
875	254.5	11.7	33.3	2.2	78.7	0.002664	0.026696	2.669	0.018	2.664	0.044
900	175.8	8.1	38.4	3.3	82.1	0.002779	0.019453	1.945	0.018	2.779	0.049
925	155.1	7.1	35.4	2.7	82.1	0.002778	0.021165	2.116	0.011	2.778	0.044
950	183	8.4	32.9	1.8	76.5	0.002591	0.029818	2.981	0.016	2.591	0.042
975	206.7	9.5	35.4	1.3	65.8	0.002229	0.040322	4.032	0.032	2.229	0.039
1000	177.3	8.1	31.3	0.8	60.2	0.002038	0.053135	5.313	0.029	2.038	0.032
1025	169.2	7.8	27.3	0.6	54	0.00183	0.070574	7.057	0.038	1.83	0.03
1050	159.5	7.3	27.8	0.6	52.2	0.001766	0.072116	7.211	0.045	1.766	0.03
1100	85.5	3.9	30.6	1.7	75.1	0.002544	0.033981	3.398	0.019	2.544	0.046
1150	27.1	1.2	49	5.9	88.2	0.002987	0.009974	0.997	0.005	2.987	0.048
1250	35.1	1.6	57.7	4.5	82.5	0.002794	0.01256	1.256	0.006	2.794	0.045
1350	31.1	1.4	34.9	2.2	76.8	0.002601	0.027708	2.771	0.023	2.601	0.047
TOTAL GAS AGE = 34.6 ± 1.3 Ma			J = .002345 ± 2.345E-05
804C1 MUSCOVITE ARGON SUMMARY (published in Stübner et al., 2014)
T°C	39Ar(mV)	39Ar(%)	AGE (Ma)	±1σ	% ATM	36Ar/40Ar	39Ar/40Ar	39Ar/40Ar * 100	±1σ	36Ar/40Ar * 1000	±1σ
650	44.5	1.4	139.1	20	90.4	0.003059	0.002811	0.281	0.001	3.059	0.048
750	287	9.2	42.8	40	85.3	0.002889	0.014321	1.043	0.005	2.889	0.044
800	422.8	13.7	52.8	1.4	61	0.002064	0.030878	3.087	0.017	2.064	0.033
825	330.4	10.7	67.2	1.5	55.5	0.00188	0.02753	2.753	0.016	1.88	0.03
850	265.3	8.5	60.3	1.9	64.8	0.002195	0.024293	2.429	0.014	2.195	0.035
875	260	8.4	59	2.2	68.2	0.002308	0.022476	2.247	0.013	2.308	0.037
900	254.7	8.2	62.9	2.1	66.5	0.002253	0.022121	2.212	0.012	2.253	0.036
925	257.6	8.3	68.5	2.8	63.8	0.002161	0.021958	2.195	0.023	2.161	0.042
950	212.2	6.8	65.1	1.9	63.6	0.002153	0.023283	2.328	0.012	2.153	0.034
975	171.4	5.5	60.9	1.9	63.5	0.002149	0.024989	2.498	0.016	2.149	0.035
1000	136.7	4.4	59.7	1.5	59	0.001997	0.028622	2.862	0.016	1.997	0.032
1050	175.3	5.6	63.1	1.3	51.9	0.001759	0.031727	3.172	0.018	1.759	0.029
1100	190.9	6.1	66	1.2	49.1	0.001664	0.03205	3.205	0.018	1.664	0.026
1200	49.4	1.6	84.7	8.4	86	0.002912	0.006819	0.681	0.003	2.912	0.046
1300	24.3	0.7	64	9.3	89.4	0.003027	0.006858	0.685	0.004	3.027	0.051
1350	3.1	0.1	95.5	56	97.3	0.003293	0.001159	0.115	1	3.293	0.054
TOTAL GAS AGE = 61.6 ± 1.5 Ma			J = .002353 ± 2.353E-05
804C1 BIOTITE ARGON SUMMARY
T°C	39Ar(mV)	39Ar(%)	AGE (Ma)	±1σ	% ATM	36Ar/40Ar	39Ar/40Ar	39Ar/40Ar * 100	±1σ	36Ar/40Ar * 1000	±1σ
650	114.6	6.8	38.4	0.7	49.1	0.001662	0.051551	5.155	0.027	1.662	0.026
675	133.4	7.9	40.3	1.4	67.1	0.002273	0.031642	3.164	0.016	2.273	0.036
700	179.1	10.7	33.4	0.3	24.3	0.000824	0.088213	8.821	0.046	0.824	0.013
725	177.2	10.5	31.5	0.2	10.1	0.000343	0.110905	11.09	0.059	0.343	0.005
750	131.5	7.8	30.9	0.2	12.8	0.000435	0.109819	10.981	0.058	0.435	0.008
775	77	4.6	30.3	0.2	16.9	0.000572	0.106655	10.665	0.061	0.572	0.01
800	62.1	3.7	30.1	0.2	24.6	0.000834	0.097393	9.739	0.054	0.834	0.013
825	57.2	3.4	29.9	0.3	25.1	0.000851	0.097409	9.74	0.054	0.851	0.015
850	67.5	4	29.5	0.3	26.1	0.000884	0.097627	9.762	0.054	0.884	0.014
875	101	6	29.7	0.3	23.1	0.000782	0.100936	10.093	0.057	0.782	0.013
900	138.5	8.2	30.2	0.2	18.1	0.000614	0.105514	10.551	0.056	0.614	0.01
925	130.7	7.8	30.4	0.2	16.4	0.000556	0.10716	10.716	0.059	0.556	0.009
950	112.3	6.7	31.4	0.3	23.8	0.000806	0.094421	9.442	0.053	0.806	0.013
975	64.1	3.8	30.6	0.2	20.8	0.000705	0.100675	10.067	0.057	0.705	0.012
1000	40.4	2.4	31.1	0.3	27.7	0.000937	0.09061	9.061	0.051	0.937	0.017
1100	46.8	2.7	33.4	0.4	37.6	0.001275	0.07262	7.262	0.041	1.275	0.021
1200	22	1.3	37.3	1.3	67.5	0.002284	0.033881	3.388	0.02	2.284	0.037
1340	16	0.9	57.1	6.2	87.1	0.002948	0.008713	0.871	0.004	2.948	0.047
TOTAL GAS AGE = 32.6 ± 0.4 Ma			J = .002181 ± 2.181E-05
806D3 MUSCOVITE ARGON SUMMARY (published in Stübner et al., 2014)
T°C	39Ar(mV)	39Ar(%)	AGE (Ma)	±1σ	% ATM	36Ar/40Ar	39Ar/40Ar	39Ar/40Ar * 100	±1σ	36Ar/40Ar * 1000	±1σ
650	21.2	0.9	22.8	47	99.1	0.003356	0.00149	0.149	0	3.356	0.055
700	23.7	1.1	15.3	45	99.4	0.003365	0.001511	0.151	0	3.365	0.054
750	30.5	1.4	19.8	28	98.8	0.003344	0.002462	0.246	0.001	3.344	0.054
775	25.6	1.1	99.8	23	93.2	0.003157	0.002756	0.275	0.001	3.157	0.052
800	39.5	1.8	81.2	16	91.9	0.003111	0.004089	0.408	0.002	3.111	0.052
825	87.7	4.1	51.7	7.2	89.2	0.003019	0.008674	0.867	0.005	3.019	0.05
850	307.6	14.3	24.6	2.2	84	0.002843	0.027159	2.715	0.016	2.843	0.046
875	364.2	17	27.2	2.1	80.2	0.002714	0.030476	3.047	0.022	2.714	0.046
900	212	9.9	39	3	82	0.002775	0.019288	1.928	0.011	2.775	0.045
925	166.1	7.7	31.2	2.9	84.4	0.002857	0.02085	2.085	0.011	2.857	0.046
950	143.5	6.7	35.4	2.7	80.9	0.00274	0.022455	2.245	0.014	2.74	0.045
975	137.5	6.4	36.2	3.1	76.9	0.002604	0.026592	2.659	0.036	2.604	0.058
1000	166.6	7.7	31.4	1.2	68.7	0.002325	0.041682	4.168	0.023	2.325	0.038
1050	261.8	12.2	29.3	0.8	60.2	0.002038	0.056818	5.681	0.031	2.038	0.033
1100	58.6	2.7	35	2.6	81	0.002743	0.022589	2.258	0.013	2.743	0.045
1200	52	2.4	40.7	4.6	86	0.002912	0.014274	1.427	0.008	2.912	0.05
1350	23.5	1	37.8	13	94.9	0.003214	0.005536	0.553	0.003	3.214	0.055
1400	15.4	0.7	28.6	55	96.5	0.003266	0.005053	0.505	0.026	3.266	0.216
TOTAL GAS AGE = 33.3 ± 2.4 Ma			J = .002343 ± 2.343E-05
807C1 MUSCOVITE ARGON SUMMARY (published in Stübner et al., 2014)
T°C	39Ar(mV)	39Ar(%)	AGE (Ma)	±1σ	% ATM	36Ar/40Ar	39Ar/40Ar	39Ar/40Ar * 100	±1σ	36Ar/40Ar * 1000	±1σ
650	6.8	0.5	28.9	1.6	27.7	0.000932	0.103726	10.372	0.728	0.932	0.139
700	10.5	0.7	26.6	1.5	42.8	0.001446	0.089292	8.929	0.353	1.446	0.078
750	19.2	1.4	72.1	5.2	80.9	0.002738	0.010893	1.089	0.006	2.738	0.045
800	25.7	1.9	25.7	0.8	36	0.001217	0.103635	10.363	0.198	1.217	0.043
825	29.9	2.2	27.2	0.6	25.3	0.000855	0.114278	11.427	0.204	0.855	0.037
850	54.1	4	26	0.5	26.7	0.000904	0.117593	11.759	0.134	0.904	0.025
875	109.9	8.1	25.1	0.3	16.3	0.000553	0.138934	13.893	0.106	0.553	0.015
900	298.1	22.2	24.4	0.2	7.6	0.000259	0.158	15.8	0.097	0.259	0.006
950	260.2	19.3	24.1	0.2	10.1	0.000342	0.1552	15.52	0.095	0.342	0.008
1000	222	16.5	24.5	0.2	12.9	0.000437	0.148474	14.847	0.096	0.437	0.01
1050	159.4	11.8	25.5	0.3	18.8	0.000636	0.132632	13.263	0.09	0.636	0.013
1100	107.1	7.9	25.5	0.3	15.2	0.000517	0.138563	13.856	0.122	0.517	0.016
1150	20.6	1.5	33.3	1	33.4	0.001131	0.083142	8.314	0.162	1.131	0.045
1200	9.2	0.6	52.8	3	66.3	0.002241	0.02639	2.639	0.036	2.241	0.046
1250	5.2	0.3	150	8.6	74	0.002505	0.006969	0.696	0.005	2.505	0.044
1440	3.4	0.2	563.8	34	79.6	0.002693	0.001296	0.129	10	2.693	0.045
TOTAL GAS AGE = 28 ± 0.4 Ma			J = .002333 ± 2.333E-05
807C1 BIOTITE ARGON SUMMARY
T°C	39Ar(mV)	39Ar(%)	AGE (Ma)	±1σ	% ATM	36Ar/40Ar	39Ar/40Ar	39Ar/40Ar * 100	±1σ	36Ar/40Ar * 1000	±1σ
650	126.1	8.6	31.6	0.5	44.5	0.001506	0.068164	6.816	0.036	1.506	0.024
675	130	8.9	37.4	1.6	71.8	0.00243	0.029235	2.923	0.015	2.43	0.038
700	148.5	10.2	29.7	0.2	24.2	0.000819	0.099337	9.933	0.053	0.819	0.013
750	219.7	15.1	29.2	0.2	8.5	0.000288	0.121733	12.173	0.064	0.288	0.004
800	31.9	2.1	31.1	0.5	41.7	0.001412	0.072806	7.28	0.042	1.412	0.024
850	117.7	8	29.7	0.3	33.5	0.001133	0.087028	8.702	0.049	1.133	0.019
875	229.7	15.8	29.3	0.2	20.9	0.00071	0.105013	10.501	0.06	0.71	0.012
900	149	10.2	30.9	0.2	16.4	0.000557	0.105019	10.501	0.062	0.557	0.009
925	106.1	7.2	30.9	0.2	20.5	0.000696	0.099904	9.99	0.056	0.696	0.012
950	105.5	7.2	30	0.4	35	0.001186	0.084209	8.42	0.048	1.186	0.02
975	44.7	3	29.3	0.7	54.9	0.001858	0.059871	5.987	0.035	1.858	0.031
1000	17.2	1.1	31.7	0.8	58.9	0.001995	0.050258	5.025	0.028	1.995	0.033
1050	18.9	1.2	26.8	1.3	73.9	0.002503	0.037797	3.779	0.021	2.503	0.042
1100	3.8	0.2	32	3.3	85.2	0.002883	0.017969	1.796	0.011	2.883	0.05
1200	3.8	0.2	130.7	27	92.8	0.003143	0.002057	0.205	0.001	3.143	0.052
1340	1.1	0	517.9	85	91.9	0.003112	0.000525	0.052	0	3.112	0.05
TOTAL GAS AGE = 31.4 ± 0.5 Ma			J = .002178 ± 2.178E-05
807D1 MUSCOVITE ARGON SUMMARY (published in Stübner et al., 2014)
T°C	39Ar(mV)	39Ar(%)	AGE (Ma)	±1σ	% ATM	36Ar/40Ar	39Ar/40Ar	39Ar/40Ar * 100	±1σ	36Ar/40Ar * 1000	±1σ
650	13	1.8	74.6	1.2	29.5	0.001	0.039237	3.923	0.022	1	0.033
750	37.6	5.4	154	5	61.1	0.00207	0.010215	1.021	0.006	2.07	0.036
800	180	26	33.2	0.3	16.4	0.000557	0.105555	10.555	0.082	0.557	0.011
825	139.4	20.1	31.6	0.2	14.5	0.000492	0.113526	11.352	0.063	0.492	0.009
850	84.5	12.2	35	0.3	20.1	0.000682	0.095897	9.589	0.068	0.682	0.012
875	61.1	8.8	39.7	0.4	26.3	0.00089	0.07783	7.783	0.046	0.89	0.016
900	36.6	5.2	45.7	0.6	32.6	0.001105	0.061735	6.173	0.037	1.105	0.022
950	35.3	5.1	50.5	0.7	37.7	0.001276	0.051594	5.159	0.03	1.276	0.022
1000	35.8	5.1	61.8	0.9	35.5	0.001201	0.043501	4.35	0.032	1.201	0.023
1050	29	4.1	56.1	0.6	31.1	0.001052	0.051265	5.126	0.027	1.052	0.019
1100	23.7	3.4	61.4	6	27.9	0.000945	0.048946	4.894	0.026	0.945	0.017
1200	13.7	1.9	102	3	57.8	0.001957	0.017076	1.707	0.009	1.957	0.035
1400	1.3	0.1	1201	29	62.8	0.002126	0.000924	0.092	0.001	2.126	0.036
TOTAL GAS AGE = 50.8 ± 0.8 Ma			J = .002354 ± 2.354E-05
807D1 BIOTITE ARGON SUMMARY
T°C	39Ar(mV)	39Ar(%)	AGE (Ma)	±1σ	% ATM	36Ar/40Ar	39Ar/40Ar	39Ar/40Ar * 100	±1σ	36Ar/40Ar * 1000	±1σ
650	136.7	8.2	42.9	0.3	20.9	0.00071	0.071508	7.15	0.038	0.71	0.011
700	235.6	14.1	47.4	0.9	48.7	0.00165	0.04189	4.189	0.026	1.65	0.026
750	292.1	17.5	44.7	0.3	5.8	0.000198	0.081667	8.166	0.045	0.198	0.003
800	102.1	6.1	44.5	0.3	17.3	0.000586	0.072058	7.205	0.04	0.586	0.009
825	63.3	3.8	42.7	0.3	20	0.000677	0.072622	7.262	0.042	0.677	0.012
850	43.4	2.6	41.8	0.4	26.2	0.000887	0.068562	6.856	0.038	0.887	0.016
900	92.8	5.5	42.8	0.3	21.3	0.000721	0.071339	7.133	0.039	0.721	0.012
950	207.7	12.5	42.9	0.3	12.2	0.000415	0.079307	7.93	0.044	0.415	0.006
975	121.9	7.3	42.8	0.3	14.9	0.000507	0.07714	7.714	0.044	0.507	0.008
1000	122.6	7.3	42.5	0.3	14.1	0.000478	0.078392	7.839	0.044	0.478	0.008
1050	154.1	9.2	43.6	0.3	12.2	0.000414	0.07811	7.811	0.048	0.414	0.008
1100	43.5	2.6	42.8	0.6	34.3	0.00116	0.059538	5.953	0.034	1.16	0.025
1200	34.9	2.1	43.7	1.6	66	0.002235	0.03013	3.013	0.017	2.235	0.04
1340	9.1	0.5	48.1	14	94.3	0.003193	0.004525	0.452	0.002	3.193	0.055
TOTAL GAS AGE = 44 ± 0.5 Ma			J = .00218 ± .0000218
807E1 MUSCOVITE ARGON SUMMARY (published in Stübner et al., 2014)
T°C	39Ar(mV)	39Ar(%)	AGE (Ma)	±1σ	% ATM	36Ar/40Ar	39Ar/40Ar	39Ar/40Ar * 100	±1σ	36Ar/40Ar * 1000	±1σ
650	9.2	0.9	33.9	3.2	0.8	2.9e-05	0.122402	12.24	1.819	0.029	0.131
750	39.1	3.9	30	4.5	90.2	0.003052	0.013604	1.36	0.007	3.052	0.048
800	54.6	5.4	26.6	2.8	51.4	0.001741	0.076089	7.608	0.305	1.741	0.114
825	57.9	5.7	21.5	1.2	9.9	0.000338	0.175183	17.518	0.824	0.338	0.051
850	156.5	15.6	23.2	1.5	12.3	0.000416	0.157452	15.745	0.847	0.416	0.037
875	143.2	14.3	22.1	0.2	8	0.000273	0.173317	17.331	0.133	0.273	0.014
900	96	9.6	22.1	0.3	7.4	0.000253	0.174525	17.452	0.183	0.253	0.021
950	137.9	13.7	21.7	0.4	17.6	0.000599	0.158648	15.864	0.197	0.599	0.023
1000	96.7	9.6	21.7	0.3	20.2	0.000685	0.153727	15.372	0.139	0.685	0.019
1050	85	8.5	21.7	0.7	17.8	0.000606	0.158281	15.828	0.357	0.606	0.045
1100	74.3	7.4	22.2	0.5	14.7	0.000499	0.160472	16.047	0.302	0.499	0.041
1150	42.9	4.2	22.7	2.1	33.2	0.001125	0.122966	12.296	0.693	1.125	0.127
1200	1.3	0.1	34.7	3.9	16.3	0.00057	0.144684	14.468	18.227	-0.57	4.771
1300	3.4	0.3	91.8	20	84.2	0.002854	0.00702	0.702	0.014	2.854	0.096
1440	1.3	0.1	99.9	154	93.7	0.003176	0.00254	0.254	0.018	3.176	0.314
TOTAL GAS AGE = 23.2 ± 0.8 Ma			J = .002333 ± 2.333E-05
807E1 BIOTITE ARGON SUMMARY
T°C	39Ar(mV)	39Ar(%)	AGE (Ma)	±1σ	% ATM	36Ar/40Ar	39Ar/40Ar	39Ar/40Ar * 100	±1σ	36Ar/40Ar * 1000	±1σ
650	110.3	6.8	27.3	0.2	23.2	0.000787	0.109454	10.945	0.057	0.787	0.013
700	192.6	11.9	31.5	1.1	66.6	0.002254	0.041208	4.12	0.022	2.254	0.036
750	245	15.2	26.8	0.2	9.8	0.000332	0.130733	13.073	0.075	0.332	0.006
800	154.1	9.5	27	0.2	19.8	0.000672	0.115554	11.555	0.062	0.672	0.011
850	122.7	7.6	25.6	0.2	17.9	0.000607	0.124462	12.446	0.07	0.607	0.01
900	130.9	8.1	26.6	0.2	23.4	0.000792	0.111947	11.194	0.061	0.792	0.013
925	93.7	5.8	26.5	0.2	18.6	0.00063	0.119536	11.953	0.068	0.63	0.01
950	134.6	8.3	26.5	0.2	13.8	0.000469	0.126416	12.641	0.071	0.469	0.01
975	126.8	7.8	26.8	0.2	15.7	0.000532	0.122378	12.237	0.073	0.532	0.01
1000	94.4	5.8	26.5	0.2	16	0.000543	0.123289	12.328	0.071	0.543	0.01
1050	113.3	7	26.1	0.2	16.3	0.000552	0.124809	12.48	0.07	0.552	0.014
1100	52.8	3.2	24.6	0.3	35.1	0.001189	0.102448	10.244	0.058	1.189	0.025
1200	23.8	1.4	23	2.6	85.6	0.002898	0.02431	2.431	0.014	2.898	0.053
1340	13.9	0.8	36.8	8	92.8	0.003143	0.007495	0.749	0.004	3.143	0.052
TOTAL GAS AGE = 27.1 ± 0.4 Ma			J = .002176 ± 2.176E-05
810B1 MUSCOVITE ARGON SUMMARY (published in Stübner et al., 2014)
T°C	39Ar(mV)	39Ar(%)	AGE (Ma)	±1σ	% ATM	36Ar/40Ar	39Ar/40Ar	39Ar/40Ar * 100	±1σ	36Ar/40Ar * 1000	±1σ
750	24.4	0.7	86.4	16	92.1	0.003117	0.003777	0.377	0.002	3.117	0.05
800	138.8	4.4	42.5	5.3	88.6	0.003	0.011187	1.118	0.006	3	0.048
825	261.7	8.4	32.3	2.5	80.4	0.002721	0.025492	2.549	0.021	2.721	0.048
850	338.2	10.9	27.3	1.7	77.1	0.00261	0.035231	3.523	0.031	2.61	0.046
875	448	14.4	28.5	1.4	74.6	0.002524	0.037455	3.745	0.019	2.524	0.04
900	269.3	8.6	32	26	81.7	0.002768	0.023915	2.391	0.018	2.768	0.049
925	279.6	9	29.2	1.8	79.1	0.002678	0.030019	3.002	0.015	2.678	0.042
950	281	9	26.3	1.3	74.1	0.002508	0.041409	4.14	0.025	2.508	0.04
975	282	9.1	24.5	0.9	67.4	0.002282	0.055824	5.582	0.03	2.282	0.036
1000	267.8	8.6	23.6	0.6	60.9	0.002063	0.069482	6.948	0.037	2.063	0.033
1025	278.7	8.9	23.3	0.5	52.1	0.001765	0.086245	8.624	0.047	1.765	0.028
1050	227.7	7.3	22.6	0.7	50.3	0.001704	0.09241	9.241	0.096	1.704	0.04
1350	0	0	-		-	-	-
TOTAL GAS AGE = 28.3 ± 1.1 Ma			J = .002353 ± 2.353E-05
810B1 BIOTITE ARGON SUMMARY
T°C	39Ar(mV)	39Ar(%)	AGE (Ma)	±1σ	% ATM	36Ar/40Ar	39Ar/40Ar	39Ar/40Ar * 100	±1σ	36Ar/40Ar * 1000	±1σ
650	181.7	14	33	0.4	40.1	0.00136	0.070404	7.04	0.037	1.36	0.021
675	252.2	19.4	34.2	0.8	56.5	0.001913	0.049437	4.943	0.026	1.913	0.03
700	181.6	14	31.8	0.4	36.8	0.001245	0.077325	7.732	0.052	1.245	0.021
775	86.3	6.6	31.2	0.3	24.2	0.000819	0.094442	9.444	0.051	0.819	0.013
800	31.5	2.4	30.7	0.5	41.8	0.001417	0.073597	7.359	0.042	1.417	0.024
825	29.2	2.2	32.2	0.7	54.3	0.00184	0.055151	5.515	0.031	1.84	0.031
850	58.2	4.4	30.3	0.3	31.5	0.001069	0.087974	8.797	0.05	1.069	0.018
875	114.8	8.8	30.2	0.2	20.8	0.000705	0.10195	10.195	0.058	0.705	0.011
900	147.5	11.3	30.6	0.2	16.5	0.000559	0.10616	10.616	0.063	0.559	0.009
925	105	8	30.6	0.2	20.6	0.000699	0.10099	10.099	0.056	0.699	0.012
950	52.7	4	31	0.4	34.8	0.001178	0.081753	8.175	0.046	1.178	0.019
975	22.3	1.7	30.4	0.7	54.5	0.001845	0.058125	5.812	0.033	1.845	0.03
1000	17	1.3	31.3	0.8	59.1	0.002002	0.050805	5.08	0.028	2.002	0.033
1050	9.4	0.7	32.4	1.4	70.6	0.002389	0.035261	3.526	0.019	2.389	0.04
1100	3.7	0.2	31	3.3	85.5	0.002893	0.018164	1.816	0.011	2.893	0.05
1200	1.9	0.1	146	28	92.2	0.003122	0.001997	0.199	0.001	3.122	0.052
1340	1.1	0	495.3	85	92.3	0.003123	0.000531	0.053	0	3.123	0.05
TOTAL GAS AGE = 32.5 ± 0.5 Ma			J = .00218 ± .0000218
811B1 BIOTITE ARGON SUMMARY
T°C	39Ar(mV)	39Ar(%)	AGE (Ma)	±1σ	% ATM	36Ar/40Ar	39Ar/40Ar	39Ar/40Ar * 100	±1σ	36Ar/40Ar * 1000	±1σ
650	40.8	3.2	39.7	0.9	49.2	0.001668	0.049668	4.966	0.041	1.668	0.029
700	139	10.9	50	5.3	67.4	0.002281	0.025303	2.53	0.07	2.281	0.096
725	100.6	7.9	45	0.4	15.5	0.000527	0.072907	7.29	0.057	0.527	0.01
750	100.9	7.9	33.9	2.3	16.1	0.000546	0.096249	9.624	0.568	0.546	0.034
800	82.6	6.5	39.6	0.4	29.6	0.001002	0.069134	6.913	0.043	1.002	0.017
850	61.3	4.8	41.1	0.6	31.9	0.00108	0.064457	6.445	0.055	1.08	0.02
900	66	5.1	42.7	2	27.8	0.000942	0.065657	6.565	0.218	0.942	0.043
950	216.5	17	36.5	0.6	17.9	0.000607	0.087497	8.749	0.122	0.607	0.012
1000	226.6	17.8	42.5	2.1	13.1	0.000446	0.07949	7.949	0.348	0.446	0.036
1025	88.2	6.9	42.5	1.2	17.9	0.000608	0.075049	7.504	0.166	0.608	0.034
1050	52.6	4.1	39.8	0.5	25.7	0.00087	0.072648	7.264	0.054	0.87	0.02
1100	34.8	2.7	49.8	1	33.3	0.001128	0.05195	5.195	0.052	1.128	0.035
1200	48.8	3.8	51.1	2.6	68.2	0.00231	0.024105	2.41	0.025	2.31	0.048
1325	11.3	0.8	138.2	22	88.6	0.002998	0.003124	0.312	0.004	2.998	0.062
TOTAL GAS AGE = 42.8 ± 1.6 Ma			J = .002184 ± 2.184E-05
814G1 MUSCOVITE ARGON SUMMARY (published in Stübner et al., 2014)
T°C	39Ar(mV)	39Ar(%)	AGE (Ma)	±1σ	% ATM	36Ar/40Ar	39Ar/40Ar	39Ar/40Ar * 100	±1σ	36Ar/40Ar * 1000	±1σ
650	17.3	1.1	11.2	73	99.7	0.003374	0.001012	0.101	0.001	3.374	0.057
700	26.2	1.8	13.8	54	99.5	0.003367	0.001484	0.148	0.001	3.367	0.059
750	45.7	3.1	21.6	22	98.2	0.003324	0.003423	0.342	0.002	3.324	0.057
701	7.3	0.5	96.1	20	90.9	0.003077	0.003875	0.387	0.004	3.077	0.058
800	271.6	18.7	19.7	4.4	92.7	0.003139	0.015372	1.537	0.01	3.139	0.052
825	189.9	13.1	60.8	36	79.8	0.002703	0.013764	1.376	0.165	2.703	0.329
850	140.3	9.6	44.4	6.5	86.6	0.002932	0.012544	1.254	0.015	2.932	0.06
875	112	7.7	59	6	85.8	0.002904	0.009986	0.998	0.005	2.904	0.047
900	84.4	5.8	58.7	7.6	88.5	0.002997	0.008089	0.808	0.004	2.997	0.049
950	112.3	7.7	22.6	8.2	94.9	0.003211	0.009446	0.944	0.008	3.211	0.057
1000	125.8	8.6	15.4	7.2	96.1	0.003254	0.010425	1.042	0.008	3.254	0.056
1050	193.5	13.3	15.2	4.9	93.5	0.003165	0.017833	1.783	0.018	3.165	0.06
1100	83.5	5.7	47.4	5.4	86.5	0.00293	0.011792	1.179	0.007	2.93	0.048
1200	30.1	2	53.2	10	91.6	0.003101	0.006527	0.652	0.004	3.101	0.052
1350	7.7	0.5	70	36	95.7	0.003241	0.002488	0.248	0.002	3.241	0.063
TOTAL GAS AGE = 35 ± 10.6 Ma			J = .002346 ± 2.346E-05
814G1 BIOTITE ARGON SUMMARY
T°C	39Ar(mV)	39Ar(%)	AGE (Ma)	±1σ	% ATM	36Ar/40Ar	39Ar/40Ar	39Ar/40Ar * 100	±1σ	36Ar/40Ar * 1000	±1σ
650	68.1	5.4	22.6	0.4	42.2	0.001428	0.100032	10.003	0.077	1.428	0.026
700	127	10.1	31.9	1.4	75.7	0.002562	0.029679	2.967	0.017	2.562	0.041
725	112.4	8.9	19.8	0.2	22.2	0.000751	0.153787	15.378	0.105	0.751	0.013
750	78.8	6.2	20.2	0.2	27.5	0.000932	0.140369	14.036	0.101	0.932	0.016
775	44	3.5	21.5	0.3	28.6	0.000967	0.129804	12.98	0.091	0.967	0.02
800	33	2.6	21.4	0.4	40.9	0.001385	0.107724	10.772	0.077	1.385	0.026
825	34.8	2.7	21.5	0.4	42.1	0.001427	0.10494	10.494	0.08	1.427	0.026
850	33.1	2.6	22.7	0.3	40.1	0.001358	0.103035	10.303	0.062	1.358	0.025
900	55.3	4.4	21.5	0.3	44	0.001492	0.101751	10.175	0.061	1.492	0.025
950	110.8	8.8	20.4	0.2	33.2	0.001124	0.127838	12.783	0.072	1.124	0.019
1000	218.4	17.3	20.9	1.3	23.1	0.000782	0.143693	14.369	0.72	0.782	0.046
1050	207.9	16.5	20.7	0.3	24.5	0.000831	0.142519	14.251	0.134	0.831	0.016
1100	94.7	7.5	21.7	0.3	39	0.00132	0.110069	11.006	0.073	1.32	0.023
1200	33.6	2.6	29.6	2.4	82.2	0.002783	0.02341	2.341	0.015	2.783	0.047
1325	2.9	0.2	404.1	57	90.4	0.003059	0.000835	0.083	0	3.059	0.05
TOTAL GAS AGE = 23.3 ± 0.7 Ma			J = .002186 ± 2.186E-05
815C1 MUSCOVITE ARGON SUMMARY (published in Stübner et al., 2014)
T°C	39Ar(mV)	39Ar(%)	AGE (Ma)	±1σ	% ATM	36Ar/40Ar	39Ar/40Ar	39Ar/40Ar * 100	±1σ	36Ar/40Ar * 1000	±1σ
650	20.2	0.8	25.7	2.9	65	0.002192	0.057082	5.708	0.167	2.192	0.11
750	61.1	2.6	30.8	2.8	83.5	0.002825	0.022476	2.247	0.014	2.825	0.047
800	89.6	3.9	25.6	0.8	49.7	0.001681	0.082468	8.246	0.084	1.681	0.039
825	330.5	14.5	24.1	0.3	29.9	0.001012	0.122354	12.235	0.08	1.012	0.02
850	382.4	16.8	22.8	0.2	13.6	0.000461	0.159153	15.915	0.116	0.461	0.016
875	213.2	9.3	22.6	0.3	19.2	0.000649	0.150583	15.058	0.128	0.649	0.026
900	142.4	6.2	23	0.4	21.7	0.000735	0.143234	14.323	0.157	0.735	0.037
950	204.7	8.9	22.3	0.3	21.1	0.000716	0.149106	14.91	0.132	0.716	0.027
1000	238.5	10.4	23	0.3	15.7	0.000532	0.154293	15.429	0.127	0.532	0.025
1050	337	14.8	22.2	0.2	9.2	0.000311	0.172055	17.205	0.124	0.311	0.021
1100	123.2	5.4	21.8	0.4	16.7	0.000566	0.160531	16.053	0.23	0.566	0.055
1200	93.8	4.1	17.5	0.9	48.4	0.001637	0.123901	12.39	0.188	1.637	0.074
1300	26.7	1.1	5	3.9	95.3	0.003219	0.039409	3.941	0.066	3.219	0.096
1400	12.3	0.5	0	9.1	106	0.003583	0.016501	1.65	0.024	3.583	0.094
TOTAL GAS AGE = 22.8 ± 0.3 Ma			J = .002356 ± 2.356E-05
815C1 BIOTITE ARGON SUMMARY
T°C	39Ar(mV)	39Ar(%)	AGE (Ma)	±1σ	% ATM	36Ar/40Ar	39Ar/40Ar	39Ar/40Ar * 100	±1σ	36Ar/40Ar * 1000	±1σ
650	66.2	5.3	39.4	0.5	40.3	0.001366	0.059022	5.902	0.031	1.366	0.022
700	360.4	28.8	39.4	0.6	46.2	0.001566	0.053181	5.318	0.028	1.566	0.024
750	235.1	18.8	36.1	0.2	7.3	0.000249	0.100073	10.007	0.053	0.249	0.004
800	51.3	4.1	36.5	0.4	31.6	0.001072	0.07307	7.307	0.04	1.072	0.017
825	29.9	2.4	37.4	0.7	50.2	0.001699	0.051979	5.197	0.028	1.699	0.027
850	27.2	2.1	36.4	0.5	37.5	0.001271	0.066915	6.691	0.037	1.271	0.021
875	40.5	3.2	36	0.3	26.1	0.000885	0.079934	7.993	0.044	0.885	0.016
900	76.2	6.1	36.2	0.3	18.3	0.000619	0.088	8.8	0.048	0.619	0.01
925	91.4	7.3	36.5	0.3	16.1	0.000544	0.089558	8.955	0.047	0.544	0.009
950	68.2	5.4	37.1	0.3	21.3	0.000722	0.08267	8.267	0.044	0.722	0.011
975	45.5	3.6	36.7	0.4	29.3	0.000992	0.075182	7.518	0.043	0.992	0.017
1000	62.2	4.9	36.8	0.3	23.8	0.000807	0.080807	8.08	0.044	0.807	0.013
1100	61.6	4.9	37.1	0.4	34.5	0.001169	0.068862	6.886	0.037	1.169	0.019
1150	24.7	1.9	39	0.9	56.1	0.0019	0.043883	4.388	0.024	1.9	0.031
1250	3.7	0.2	89.9	14	90.9	0.003078	0.003859	0.385	0.002	3.078	0.05
1350	3.1	0.2	281.6	49	91.9	0.003112	0.00104	0.104	0	3.112	0.05
TOTAL GAS AGE = 38.3 ± 0.6 Ma			J = .002188 ± 2.188E-05
815E1 MUSCOVITE ARGON SUMMARY (published in Stübner et al., 2014)
T°C	39Ar(mV)	39Ar(%)	AGE (Ma)	±1σ	% ATM	36Ar/40Ar	39Ar/40Ar	39Ar/40Ar * 100	±1σ	36Ar/40Ar * 1000	±1σ
650	9.5	0.3	48.3	2.1	5.2	0.00018	0.082119	8.211	0.844	0.18	0.264
750	42.5	1.6	28.7	5	91.2	0.003089	0.012734	1.273	0.007	3.089	0.05
800	119.2	4.5	28.2	0.5	28.9	0.000981	0.105377	10.537	0.115	0.981	0.024
825	167.2	6.3	25.7	0.3	12.8	0.000433	0.141882	14.188	0.15	0.433	0.021
850	297.8	11.3	23.7	0.2	9.4	0.000318	0.160087	16.008	0.124	0.318	0.014
875	295.8	11.2	22.9	0.2	7	0.00024	0.170174	17.017	0.136	0.24	0.014
900	403.9	15.3	22	0.1	4.8	0.000165	0.181326	18.132	0.127	0.165	0.011
950	361.9	13.7	22.3	0.2	9	0.000305	0.170654	17.065	0.122	0.305	0.012
1000	249.4	9.5	22.8	0.2	13	0.00044	0.159818	15.981	0.139	0.44	0.016
1050	221.2	8.4	23.1	0.2	11.9	0.000404	0.159902	15.99	0.151	0.404	0.018
1100	203.9	7.7	22.4	0.2	7.7	0.000262	0.17272	17.272	0.189	0.262	0.021
1150	196.7	7.4	22.2	0.3	7.3	0.000248	0.175105	17.51	0.196	0.248	0.023
1200	27.7	1	28.3	1.5	47.9	0.001626	0.077109	7.71	0.238	1.626	0.062
1300	19.1	0.7	54.3	3.4	73.6	0.002493	0.020206	2.02	0.025	2.493	0.047
1440	7.4	0.2	79.3	12	89.4	0.003027	0.005519	0.551	0.005	3.027	0.053
TOTAL GAS AGE = 23.7 ± .3 Ma			J = .00234 ± .0000234
819A2 MUSCOVITE ARGON SUMMARY (published in Stübner et al., 2014)
T°C	39Ar(mV)	39Ar(%)	AGE (Ma)	±1σ	% ATM	36Ar/40Ar	39Ar/40Ar	39Ar/40Ar * 100	±1σ	36Ar/40Ar * 1000	±1σ
650	10.6	0.3	30.4	3.1	59.1	0.001977	0.055586	5.558	0.32	1.977	0.109
750	36.8	1.3	35.8	5.7	90.6	0.003065	0.010923	1.092	0.006	3.065	0.05
800	61.5	2.1	21.7	0.7	40.3	0.00136	0.114812	11.481	0.239	1.36	0.043
825	64.9	2.3	21.5	0.6	32.7	0.001102	0.130495	13.049	0.297	1.102	0.047
850	151.8	5.4	21.2	0.4	31.3	0.001059	0.135585	13.558	0.148	1.059	0.025
875	154.9	5.5	21.4	0.4	35.6	0.001203	0.125974	12.597	0.129	1.203	0.026
900	271.7	9.6	21	0.2	17.2	0.000584	0.164893	16.489	0.138	0.584	0.016
950	487.5	17.3	20.9	0.2	10.6	0.00036	0.178831	17.883	0.117	0.36	0.01
1000	367	13	20.9	0.2	15.5	0.000527	0.169311	16.931	0.122	0.527	0.013
1050	518.5	18.4	21.1	0.2	10.8	0.000367	0.177092	17.709	0.113	0.367	0.01
1100	443.6	15.7	21.2	0.2	8.5	0.000289	0.180679	18.067	0.124	0.289	0.011
1150	139.4	4.9	21.4	0.3	18.9	0.000639	0.158109	15.81	0.212	0.639	0.027
1200	45.9	1.6	21.9	1	51.6	0.001739	0.092318	9.231	0.206	1.739	0.049
1300	42.5	1.5	25.7	1.7	74.1	0.002504	0.04207	4.207	0.051	2.504	0.047
1440	12.6	0.4	50.9	8.4	89.8	0.003036	0.008285	0.828	0.007	3.036	0.053
TOTAL GAS AGE = 21.5 ± 0.3 Ma			J = .002342 ± 2.342E-05
819A2 BIOTITE ARGON SUMMARY
T°C	39Ar(mV)	39Ar(%)	AGE (Ma)	±1σ	% ATM	36Ar/40Ar	39Ar/40Ar	39Ar/40Ar * 100	±1σ	36Ar/40Ar * 1000	±1σ
650	92.7	6.3	37.2	0.6	47.4	0.001606	0.054885	5.488	0.028	1.606	0.025
700	205	14.1	42.4	1	56.7	0.001919	0.039562	3.956	0.02	1.919	0.03
725	190.4	13.1	37.7	0.2	9.3	0.000315	0.093275	9.327	0.049	0.315	0.005
750	169.3	11.6	37.5	0.2	6.7	0.000229	0.096429	9.642	0.052	0.229	0.004
775	106.4	7.3	37.5	0.2	9.2	0.000314	0.093956	9.395	0.052	0.314	0.006
800	63.4	4.3	37.3	0.3	16.7	0.000567	0.086591	8.659	0.047	0.567	0.01
825	44.8	3	37.3	0.3	25.5	0.000864	0.077564	7.756	0.041	0.864	0.017
850	37.8	2.6	36.3	0.4	30.5	0.001034	0.074331	7.433	0.041	1.034	0.017
875	40.9	2.8	37.2	0.4	27.7	0.000938	0.075389	7.538	0.042	0.938	0.017
900	55.5	3.8	37.1	0.3	24.5	0.000831	0.078988	7.898	0.044	0.831	0.014
925	74	5.1	37.6	0.3	17.7	0.000599	0.084907	8.49	0.047	0.599	0.01
950	80	5.5	37.5	0.3	15.9	0.000539	0.086929	8.692	0.049	0.539	0.009
975	144.2	9.9	42.7	1.3	64.1	0.002169	0.03256	3.256	0.017	2.169	0.034
1000	32.4	2.2	37.3	0.3	20.6	0.000699	0.082591	8.259	0.046	0.699	0.015
1050	34.8	2.4	37.7	0.4	26.1	0.000883	0.076158	7.615	0.042	0.883	0.016
1100	25.5	1.7	37.7	0.5	36.4	0.001231	0.06545	6.545	0.038	1.231	0.022
1200	41.9	2.8	44.5	1.5	66.1	0.002238	0.029491	2.949	0.015	2.238	0.036
1340	9.7	0.6	62.7	6.6	86.7	0.002935	0.00815	0.815	0.004	2.935	0.047
TOTAL GAS AGE = 39 ± 0.5 Ma			J = .002177 ± 2.177E-05
823G3 MUSCOVITE ARGON SUMMARY (published in Stübner et al., 2014)
T°C	39Ar(mV)	39Ar(%)	AGE (Ma)	±1σ	% ATM	36Ar/40Ar	39Ar/40Ar	39Ar/40Ar * 100	±1σ	36Ar/40Ar * 1000	±1σ
650	1.1	0	290.1	134	93.1	0.003153	0.000919	0.092	0.001	3.153	0.113
750	4.8	0.2	309.3	76	91.4	0.003096	0.001071	0.107	0.001	3.096	0.075
800	13.5	0.6	67.3	7.3	83.2	0.002818	0.010351	1.035	0.011	2.818	0.059
825	13	0.6	42.1	2.4	76.7	0.002598	0.023138	2.313	0.015	2.598	0.043
850	1270.2	65	24.1	0.3	40.3	0.001367	0.104095	10.409	0.057	1.367	0.022
875	305.9	15.6	21.9	0.4	48.2	0.001633	0.099628	9.963	0.056	1.633	0.026
900	25	1.2	19.8	0.5	53.9	0.001824	0.09803	9.803	0.056	1.824	0.037
925	242.9	12.4	22.4	0.5	52.9	0.001791	0.088527	8.853	0.048	1.791	0.028
950	2.1	0.1	20.1	3.1	77.9	0.002636	0.046325	4.632	0.06	2.636	0.112
975	3.1	0.1	19.4	4	69.7	0.002359	0.065723	6.572	0.315	2.359	0.179
1000	4.7	0.2	20	1.5	72.7	0.002462	0.057344	5.734	0.044	2.462	0.067
1050	12.9	0.6	26.1	1.9	73.4	0.002485	0.04286	4.286	0.034	2.485	0.062
1100	29.2	1.4	22.9	0.8	66	0.002236	0.062338	6.234	0.037	2.236	0.038
1200	21.4	1	116.1	19	91.3	0.00309	0.003074	0.307	0.001	3.09	0.049
1350	1.4	0	37.7	38	98.3	0.003328	0.001836	0.184	0.001	3.328	0.111
TOTAL GAS AGE = 25.9 ± 0.8 Ma			J = .002356 ± 2.356E-05
823G3 BIOTITE ARGON SUMMARY
T°C	39Ar(mV)	39Ar(%)	AGE (Ma)	±1σ	% ATM	36Ar/40Ar	39Ar/40Ar	39Ar/40Ar * 100	±1σ	36Ar/40Ar * 1000	±1σ
650	125.9	9.9	105.6	3.1	21.1	0.000716	0.028599	2.859	0.068	0.716	0.021
700	219.9	17.4	110.2	11	29.5	0.001001	0.024443	2.444	0.188	1.001	0.081
725	162.2	12.8	99.3	1.5	6.5	0.000221	0.036148	3.614	0.051	0.221	0.017
750	119.3	9.4	92.1	0.6	7.1	0.000243	0.038758	3.875	0.026	0.243	0.004
800	124.5	9.8	87.1	0.6	14.7	0.000498	0.037733	3.773	0.023	0.498	0.008
825	142.2	11.2	83.3	1	12	0.000407	0.040721	4.072	0.045	0.407	0.008
850	52.7	4.1	90.3	0.8	26	0.00088	0.031505	3.15	0.019	0.88	0.014
875	20.6	1.6	98.9	1.7	45.9	0.001555	0.020987	2.098	0.013	1.555	0.025
900	22.7	1.8	95.4	2.3	42.5	0.001439	0.023148	2.314	0.03	1.439	0.028
950	67.4	5.3	85.2	1.8	24	0.000812	0.034347	3.434	0.057	0.812	0.019
975	67	5.3	86.4	1.1	17.7	0.000599	0.0367	3.67	0.038	0.599	0.013
1000	65.3	5.1	80.7	4	19.8	0.000673	0.038295	3.829	0.158	0.673	0.031
1025	35.3	2.8	84.7	1.11	22.3	0.000756	0.035334	3.533	0.034	0.756	0.015
1050	18.3	1.4	106.5	8.7	28.4	0.000963	0.02572	2.572	0.159	0.963	0.061
1100	5.2	0.4	126.9	14	38	0.001289	0.018585	1.858	0.133	1.289	0.096
1200	9.5	0.7	123.1	24	64.4	0.00218	0.011016	1.101	0.079	2.18	0.166
1340	2	0.1	1859.3	988	45.8	0.001551	0.000657	0.065	0.03	1.551	0.766
TOTAL GAS AGE = 100 ± 9.3 Ma			J = .002189 ± 2.189E-05
823G2 BIOTITE ARGON SUMMARY
T°C	39Ar(mV)	39Ar(%)	AGE (Ma)	±1σ	% ATM	36Ar/40Ar	39Ar/40Ar	39Ar/40Ar * 100	±1σ	36Ar/40Ar * 1000	±1σ
650	101.8	7.2	102.7	0.8	21.9	0.000743	0.029074	2.907	0.015	0.743	0.011
700	250	17.7	109.5	1	28.5	0.000967	0.02491	2.491	0.013	0.967	0.015
750	327.8	23.2	106	0.5	2.4	8.2e-05	0.035194	3.519	0.018	0.082	0.001
800	129.4	9.1	104.9	0.6	5.4	0.000183	0.03449	3.449	0.021	0.183	0.003
825	45.5	3.2	103.5	0.7	10.4	0.000353	0.033121	3.312	0.018	0.353	0.006
850	33.9	2.4	102.8	0.7	16.4	0.000555	0.03114	3.114	0.017	0.555	0.009
875	42.1	2.9	105.2	0.7	12.1	0.000409	0.031953	3.195	0.017	0.409	0.007
900	59.7	4.2	105.9	0.6	8.9	0.000303	0.032871	3.287	0.017	0.303	0.005
925	71.8	5	106.5	0.6	8	0.000272	0.032998	3.299	0.018	0.272	0.004
950	76.1	5.4	106.7	0.6	8	0.00027	0.032963	3.296	0.018	0.27	0.004
975	75.8	5.3	107	0.6	8.1	0.000276	0.032806	3.28	0.017	0.276	0.004
1000	65.7	4.6	107.8	0.6	8	0.000273	0.032602	3.26	0.018	0.273	0.004
1100	80.5	5.7	108.5	0.6	10.5	0.000356	0.031516	3.151	0.016	0.356	0.005
1200	40.5	2.8	113.9	1.5	37.9	0.001285	0.02079	2.079	0.013	1.285	0.021
1340	7.9	0.5	154.3	13	84.2	0.002852	0.003844	0.384	0.002	2.852	0.046
TOTAL GAS AGE = 107 ± 1.1 Ma			J = .002185 ± 2.185E-05
827B1 MUSCOVITE ARGON SUMMARY (published in Stübner et al., 2014)
T°C	39Ar(mV)	39Ar(%)	AGE (Ma)	±1σ	% ATM	36Ar/40Ar	39Ar/40Ar	39Ar/40Ar * 100	±1σ	36Ar/40Ar * 1000	±1σ
700	63.2	4.1	127.9	11	84.6	0.002864	0.004899	0.489	0.002	2.864	0.045
750	61.4	4	108.6	6.8	79.7	0.0027	0.007626	0.762	0.004	2.7	0.043
800	177.3	11.7	64.8	3.3	75.7	0.002563	0.015535	1.553	0.008	2.563	0.04
850	369.5	24.4	39.1	1.9	73.8	0.002498	0.02797	2.797	0.015	2.498	0.04
900	212.5	14	43.3	3.8	84.4	0.002859	0.014933	1.493	0.007	2.859	0.045
950	166.7	11	57.6	3.6	79	0.002674	0.015115	1.511	0.008	2.674	0.043
975	104.1	6.8	45.7	2.5	76.8	0.0026	0.021109	2.11	0.011	2.6	0.041
1000	101.5	6.7	40.8	1.7	71.5	0.002422	0.029038	2.903	0.015	2.422	0.039
1050	165.2	10.9	37.6	1.3	65.7	0.002224	0.038024	3.802	0.022	2.224	0.036
1100	57.5	3.8	43.3	3.1	81.2	0.002749	0.018044	1.804	0.008	2.749	0.044
1200	21	1.3	77	8.3	86.9	0.002941	0.007021	0.702	0.003	2.941	0.047
1340	9.1	0.6	136.6	25	91.7	0.003105	0.002451	0.245	0.001	3.105	0.05
TOTAL GAS AGE = 53.1 ± 2.2 Ma			J = .002343 ± 2.343E-05
827B1 BIOTITE ARGON SUMMARY
T°C	39Ar(mV)	39Ar(%)	AGE (Ma)	±1σ	% ATM	36Ar/40Ar	39Ar/40Ar	39Ar/40Ar * 100	±1σ	36Ar/40Ar * 1000	±1σ
650	240.2	12.4	173.1	1	10.2	0.000345	0.01951	1.951	0.01	0.345	0.005
700	354.9	18.3	187.6	1.2	16.4	0.000555	0.016686	1.668	0.009	0.555	0.009
725	260.3	13.4	185.5	1	4	0.000136	0.01939	1.939	0.01	0.136	0.002
750	133.8	6.9	196.6	1	2.8	9.5e-05	0.018469	1.846	0.01	0.095	0.001
800	61	3.1	178.7	1	9.1	0.000308	0.019103	1.91	0.01	0.308	0.005
825	54.1	2.8	167.8	1	10.6	0.00036	0.020053	2.005	0.011	0.36	0.006
850	42.2	2.1	165.3	1.1	14.9	0.000507	0.019388	1.938	0.01	0.507	0.008
900	136	7	183.8	1.2	6.8	0.000231	0.019002	1.9	0.012	0.231	0.004
950	475.7	24.6	184.9	1	3.6	0.000122	0.019541	1.954	0.01	0.122	0.002
975	136.8	7	197.3	1.1	5.3	0.00018	0.017919	1.791	0.01	0.18	0.003
1000	22.6	1.1	164.6	1.3	22.2	0.000753	0.0178	1.78	0.01	0.753	0.012
1050	8.6	0.4	92.1	2.1	55.6	0.001883	0.018524	1.852	0.01	1.883	0.03
1100	2.1	0.1	141.4	9.7	79.3	0.002683	0.005555	0.555	0.003	2.683	0.048
1200	0.6	0	260.1	72	93.5	0.003167	0.000903	0.09	1	3.167	0.064
1325	0.8	0	229.7	91	95.8	0.003244	0.000663	0.066	1	3.244	0.058
TOTAL GAS AGE = 183.9 ± 1.9 Ma		J = .002189 ± 2.189E-05
37Ar/39Ar, 36Ar/40Ar AND 39Ar/40Ar ARE CORRECTED FOR MASS SPECTROMETER
DISCRIMINATION, INTERFERING ISOTOPES AND SYSTEM BLANKS
% IIC - INTERFERING ISOTOPES CORRECTION
