# Supplementary material
Source: publisher figshare collection journal article supplement (https://gsapubs.figshare.com/ndownloader/files/23303600)
Supplement: Supplementary file 1 [file 23303600 › DR Table S2 ArAr data Freiberg.xlsx]

## Sheet: Tabelle1
Stübner, K., Warren, C., Ratschbacher, L., Sperner, B., Kleeberg, R., Pfänder, J., and Grujic, D., 2017, Anomalously old biotite 40Ar/39Ar ages in the NW Himalaya: Lithosphere, doi:10.1130/L586.1.
Table S2. Analytical Resuls of 40Ar/39Ar Geochronology (Argon Lab Freiberg).
Sample:	807A1																	Blank intercepts:
Project:	Himalaya			Irradiation:	FGA013P2H8 (End date: 2013-05-28 11:30:00.0)				Interfering isotope production ratios:			Decay constants:						exp.#	Step	36Ar	±σ36	37Ar	±σ37	38Ar	±σ38	39Ar	±σ39	40Ar	±σ40
Owner:	Stuebner			Measurement Date:	2013-08-20 20:37:27.0															[V]	[V]	[V]	[V]	[V]	[V]	[V]	[V]	[V]	[V]
				Device:	CO2-Laser				ca3637 =	0.000245 +/- 0.000012		lambda40 =	5.5492e-010 +/- 9.3000e-013 1/a					5355	0	-0.00469981	5.84056e-05	-0.00237731	6.40337e-05	-0.00256715	5.72744e-05	0.0311724	5.52796e-05	-0.00357394	0.000136266
				Air:	295.5				ca3937 =	0.000932 +/- 0.000035		lambda39 =	0.002577 +/- 0.000026 1/a
Exp-Nr:	5356			J-Value:	0.0030926		f-value:	0.992586	k3839 =	0.01211 +/- 0.00061		lambda37 =	7.2438 +/- 0.0214 1/a
Material:	3.08 mg Musc			J-Value Error:	5.93485e-06		f-value Error:	0.000202654	k4039 =	0.00183 +/- 0.00009
				Reference Standard(s): FCT01 - 28.305 +/- 0.036 Ma (two standards in neighboring holes)								Fit model: automatic		All errors are 1σ!				Blank corrected intensity intercepts:
Nr.	Step	39Ar(K)	39Ar(K)	39Ar	40Ar*	36Ar_atm	40Ar*	40Ar/36Ar	37Ar/36Ar	37Ar/39Ar	K/Ca	K/Ca	40Ar*/39Ar(K)	40Ar*/39Ar(K)	Age	Age		Nr.	Step	36Ar	±σ36	37Ar	±σ37	38Ar	±σ38	39Ar	±σ39	40Ar	±σ40
		[V]	[%]	[10e-14 mol]	[V]	[V]	[%]					Error		Error	[Ma]	Error [Ma]				[V]	[V]	[V]	[V]	[V]	[V]	[V]	[V]	[V]	[V]
1	0.03	0.012741	0.328485	0.434168	0.0456252	0.00061134	20.1614	370.17	0	0	Inf	Inf	3.58099	1.87583	19.8473	10.3397		1	0.03	0.000593604	7.84427e-05	0	9.22993e-05	0.00025141	8.27328e-05	0.012639	0.000120536	0.226299	0.00104893
2	0.04	0.122684	3.163	4.18063	0.45043	0.00159222	48.8983	578.513	0.0291481	0.000378532	257.593	493.616	3.67148	0.203347	20.3461	1.12173		2	0.04	0.00154609	8.18197e-05	4.53949e-05	8.69883e-05	0.00149284	8.34606e-05	0.121702	0.000197893	0.921157	0.00129145
3	0.05	0.176322	4.5459	6.00845	0.653726	0.0013975	61.267	763.51	0.00236059	1.87209e-05	5208.48	137660	3.70756	0.152375	20.5449	0.841186		3	0.05	0.00135697	8.77767e-05	3.22664e-06	8.528e-05	0.00196714	8.29379e-05	0.174911	0.000447031	1.06701	0.00231019
4	0.059	0.143737	3.7058	4.89807	0.523032	0.000477305	78.7297	1391.76	0.0516669	0.000171682	567.951	2349.08	3.6388	0.201491	20.166	1.11161		4	0.059	0.000463489	9.47632e-05	2.4122e-05	9.977e-05	0.00152424	9.34364e-05	0.142587	0.000444975	0.664339	0.00209777
5	0.069	0.19199	4.94983	6.54233	0.721579	0.000834742	74.4974	1160.35	0	0	Inf	Inf	3.75843	0.163135	20.8251	0.900268		5	0.069	0.000810525	0.000102434	0	9.05866e-05	0.00207754	8.83941e-05	0.190453	0.000498215	0.968596	0.00235308
6	0.079	0.215738	5.56212	7.35161	0.796437	0.000580203	82.2526	1668.83	0.0151951	4.08906e-05	2384.59	24375.7	3.69168	0.118564	20.4574	0.655368		6	0.079	0.000563382	8.32711e-05	8.62318e-06	8.81477e-05	0.00224832	8.64015e-05	0.214011	0.000612994	0.968282	0.00261103
7	0.088	0.26922	6.94097	9.17408	1.00189	0.000709457	82.6623	1708.37	0.00470815	1.24145e-05	7854.28	199030	3.72145	0.0902098	20.6214	0.499776		7	0.088	0.00068888	7.86265e-05	3.26704e-06	8.27877e-05	0.00278147	7.65098e-05	0.267065	0.000734029	1.21203	0.00309925
8	0.094	0.228625	5.89436	7.79074	0.838835	0.000418099	87.1244	2302.5	0.10301	0.000188517	517.234	1119.45	3.66905	0.114527	20.3327	0.633212		8	0.094	0.000406024	8.44225e-05	4.21299e-05	9.11818e-05	0.00228828	8.69859e-05	0.226795	0.000855473	0.962802	0.00392971
9	0.099	0.242583	6.25422	8.26638	0.890471	0.000381675	88.7189	2629.72	0	0	Inf	Inf	3.67079	0.104505	20.3423	0.578186		9	0.099	0.000370602	7.8812e-05	0	9.04551e-05	0.002452	7.97181e-05	0.240641	0.00146047	1.0037	0.00617727
10	0.103	0.202904	5.23122	6.91426	0.746014	0.000479996	83.9894	1850.25	0.0950956	0.000225123	433.129	978.88	3.67668	0.133908	20.3747	0.739696		10	0.103	0.000466129	8.86488e-05	4.46506e-05	0.000100911	0.00205127	9.15967e-05	0.20128	0.000576676	0.888224	0.00240594
11	0.108	0.222901	5.74678	7.59568	0.820824	0.000576924	82.7683	1718.87	0.0405305	0.000104971	928.894	3554.3	3.68246	0.121942	20.4066	0.673936		11	0.108	0.000560217	8.81697e-05	2.28718e-05	8.7516e-05	0.0023496	7.80247e-05	0.221117	0.000671804	0.991713	0.00354348
12	0.114	0.201932	5.20616	6.88114	0.728274	0.000526413	82.3654	1679.47	0.0906456	0.000236471	412.343	799.891	3.60653	0.136811	19.9881	0.755753		12	0.114	0.000511202	8.91639e-05	4.66767e-05	9.05461e-05	0.00209464	8.43055e-05	0.200316	0.000886154	0.884199	0.00406076
13	0.12	0.227241	5.85868	7.74359	0.832336	0.000396064	87.6338	2398.07	0	0	Inf	Inf	3.66278	0.127097	20.2981	0.702281		13	0.12	0.000384574	9.12977e-05	0	0.000100067	0.00237821	9.0344e-05	0.225422	0.00130988	0.949789	0.00622454
14	0.121	0.150333	3.87586	5.12284	0.549175	0.000256096	87.8502	2440.68	0.0950513	0.000162039	601.753	2563	3.65305	0.182784	20.2445	1.0086		14	0.121	0.000248698	8.75048e-05	2.38118e-05	0.000101419	0.0015726	8.39521e-05	0.14913	0.00113757	0.625127	0.00532307
15	0.128	0.196997	5.07894	6.71298	0.721338	0.000294085	89.2082	2749.14	0.1136	0.000169713	574.542	1684.68	3.66167	0.144187	20.292	0.796235		15	0.128	0.000285596	8.03177e-05	3.26807e-05	9.58258e-05	0.00199945	8.39837e-05	0.19542	0.0024507	0.808601	0.0112913
16	0.138	0.227387	5.86245	7.74857	0.829738	0.000364523	88.4704	2572.65	0.0659756	0.000105837	921.295	3840.61	3.64901	0.121661	20.2222	0.672423		16	0.138	0.000353978	8.55278e-05	2.35246e-05	9.80668e-05	0.0023081	9.3031e-05	0.225567	0.0016114	0.937871	0.00725614
17	0.152	0.235466	6.07073	8.02387	0.842209	0.000400217	87.6476	2400.27	0.218606	0.000371888	262.195	276.818	3.57677	0.148051	19.8241	0.817622		17	0.152	0.000388717	8.6548e-05	8.55969e-05	9.0357e-05	0.00237489	9.35307e-05	0.233582	0.00414174	0.960904	0.017277
18	0.175	0.36815	9.49155	12.5453	1.34623	0.000663039	87.2571	2326.56	0.114432	0.000206246	472.771	539.832	3.65674	0.0987788	20.2649	0.546772		18	0.175	0.0006439	8.56841e-05	7.42212e-05	8.4744e-05	0.00376173	9.44498e-05	0.365203	0.00431372	1.54283	0.0197362
19	0.2	0.171752	4.42807	5.85271	0.631797	0.000161795	92.922	4200.7	0.303634	0.000286314	340.56	602.387	3.67854	0.375983	20.385	2.07245		19	0.2	0.000157163	8.01936e-05	4.80687e-05	8.49696e-05	0.00169382	0.000136473	0.170377	0.010814	0.679921	0.0443435
20	0.24	0.070006	1.80488	2.38556	0.251822	7.0215e-05	92.3444	3880.22	0.699531	0.000702677	138.765	253.288	3.59715	0.403896	19.9364	2.22675		20	0.24	6.82404e-05	8.04841e-05	4.8085e-05	8.77523e-05	0.000715743	8.26199e-05	0.0694459	0.00250952	0.272699	0.0108043
Sample:	807A1																	Blank intercepts:
Project:	Himalaya			Irradiation:	FGA013P2H11 (End date: 2013-05-28 11:30:00.0)				Interfering isotope production ratios:			Decay constants:						exp.#	Step	36Ar	±σ36	37Ar	±σ37	38Ar	±σ38	39Ar	±σ39	40Ar	±σ40
Owner:	Stuebner			Measurement Date:	2013-08-24 13:50:16.0															[V]	[V]	[V]	[V]	[V]	[V]	[V]	[V]	[V]	[V]
				Device:	CO2-Laser				ca3637 =	0.000245 +/- 0.000012		lambda40 =	5.5492e-010 +/- 9.3000e-013 1/a					5375	0	-0.00469802	3.99087e-05	-0.002402	5.02015e-05	-0.00252422	5.0142e-05	0.0311831	5.80237e-05	-0.00410899	0.000116761
				Air:	295.5				ca3937 =	0.000932 +/- 0.000035		lambda39 =	0.002577 +/- 0.000026 1/a
Exp-Nr:	5376			J-Value:	0.0030926		f-value:	0.993067	k3839 =	0.01211 +/- 0.00061		lambda37 =	7.2438 +/- 0.0214 1/a
Material:	3.02 mg Bt			J-Value Error:	5.93485e-06		f-value Error:	0.000256888	k4039 =	0.00183 +/- 0.00009
				Reference Standard(s): FCT01 - 28.305 +/- 0.036 Ma (two standards in neighboring holes)								Fit model: automatic		All errors are 1σ!				Blank corrected intensity intercepts:
Nr.	Step	39Ar(K)	39Ar(K)	39Ar	40Ar*	36Ar_atm	40Ar*	40Ar/36Ar	37Ar/36Ar	37Ar/39Ar	K/Ca	K/Ca	40Ar*/39Ar(K)	40Ar*/39Ar(K)	Age	Age		Nr.	Step	36Ar	±σ36	37Ar	±σ37	38Ar	±σ38	39Ar	±σ39	40Ar	±σ40
		[V]	[%]	[10e-14 mol]	[V]	[V]	[%]					Error		Error	[Ma]	Error [Ma]				[V]	[V]	[V]	[V]	[V]	[V]	[V]	[V]	[V]	[V]
1	0.03	0.0118546	0.315333	0.388949	0.0341018	0.00370224	3.02285	304.715	0.00369114	0.00115347	78.5275	447.4	2.87667	1.90534	15.9609	10.525		1	0.03	0.00360169	7.41737e-05	1.33853e-05	7.62605e-05	0.000812297	7.72383e-05	0.0117652	9.48244e-05	1.12814	0.001121
2	0.035	0.0442565	1.17722	1.45205	0.169331	0.00204271	21.9048	378.435	0.000236532	1.09242e-05	8291.67	1179492	3.82612	0.456909	21.198	2.51718		2	0.035	0.00198722	6.64907e-05	4.73255e-07	6.73206e-05	0.00096285	6.90016e-05	0.0439224	9.83659e-05	0.773031	0.000686967
3	0.04	0.192118	5.11035	6.30337	0.683462	0.00273501	45.8081	545.508	0.0185496	0.000264244	342.787	506.802	3.5575	0.10604	19.7179	0.586676		3	0.04	0.00266079	6.66989e-05	4.9694e-05	7.34708e-05	0.003083	7.62661e-05	0.190668	0.000245481	1.49201	0.00175645
4	0.044	0.236278	6.285	7.75225	0.847135	0.00126925	69.2879	963.223	0.0352644	0.000189562	477.837	757.528	3.58533	0.0732157	19.8713	0.406704		4	0.044	0.00123483	5.67438e-05	4.38434e-05	6.95056e-05	0.00343211	7.10825e-05	0.234495	0.000224733	1.22263	0.00115411
5	0.046	0.223037	5.93278	7.3178	0.797113	0.000702733	79.3006	1430.23	0.0765546	0.00024138	375.257	480.139	3.57391	0.0846395	19.8083	0.469249		5	0.046	0.000683717	6.20071e-05	5.26996e-05	6.74281e-05	0.0030767	7.16266e-05	0.221353	0.000197668	1.00518	0.00101329
6	0.048	0.163207	4.34131	5.3548	0.579742	0.000361148	84.417	1901.44	0.0623077	0.000137973	656.502	2449.1	3.55219	0.130354	19.6886	0.720314		6	0.048	0.000351368	6.99795e-05	2.20426e-05	8.22305e-05	0.00226094	7.30049e-05	0.161975	0.000174594	0.68676	0.000594363
7	0.052	0.193956	5.15923	6.36367	0.701578	0.000358625	86.839	2252.56	0.0733335	0.000135692	667.539	1925.66	3.6172	0.0945393	20.0469	0.523526		7	0.052	0.000348919	6.02625e-05	2.57624e-05	7.43171e-05	0.00266531	6.97548e-05	0.192492	0.000196452	0.807907	0.000775784
8	0.057	0.196832	5.23572	6.45801	0.710351	0.000276261	89.6516	2867.41	0.171276	0.0002406	376.474	628.529	3.60893	0.0859927	20.0013	0.476667		8	0.057	0.000268821	5.566e-05	4.63575e-05	7.73942e-05	0.00264237	7.44406e-05	0.195346	0.000162755	0.792346	0.00050988
9	0.064	0.2063	5.48759	6.76868	0.74311	0.000281638	89.8874	2934.73	0.152908	0.000208922	433.557	711.977	3.60208	0.0813395	19.9636	0.451174		9	0.064	0.000274047	5.49358e-05	4.21904e-05	6.92839e-05	0.00283614	7.639e-05	0.204743	0.000301332	0.826712	0.00137463
10	0.074	0.286828	7.62962	9.41077	1.03397	0.000326313	91.4273	3465.12	0.127078	0.000144687	626.037	1126.68	3.60483	0.0728944	19.9788	0.404957		10	0.074	0.000317505	6.87143e-05	4.06238e-05	7.31103e-05	0.00394256	7.29647e-05	0.284663	0.000213414	1.13092	0.000907482
11	0.084	0.244687	6.50867	8.02814	0.884697	0.000294668	90.9977	3297.85	0.326835	0.000394022	229.885	192.498	3.61563	0.0765115	20.0383	0.424748		11	0.084	0.000286796	6.15367e-05	9.43759e-05	7.90257e-05	0.00334067	6.95841e-05	0.24284	0.000190967	0.97222	0.000747707
12	0.094	0.196416	5.22466	6.44437	0.705063	0.000326141	87.9353	2455.98	0.709809	0.00118052	76.7284	27.3085	3.58964	0.0981348	19.8951	0.543261		12	0.094	0.000317599	6.34068e-05	0.000226976	8.07745e-05	0.00267234	7.65724e-05	0.194934	0.000145217	0.801797	0.000519323
13	0.106	0.291598	7.7565	9.56727	1.05569	0.0003705	90.5623	3143.75	0.578349	0.000735896	123.087	39.6301	3.62037	0.0664653	20.0644	0.369841		13	0.106	0.000360729	6.36933e-05	0.000210054	6.76214e-05	0.00401146	7.52278e-05	0.289397	0.000214499	1.16571	0.000789476
14	0.116	0.360621	9.5925	11.8319	1.31425	0.000291457	93.8056	4804.01	0.4411	0.000356944	253.764	144.133	3.6444	0.0544529	20.1969	0.304439		14	0.116	0.000283715	6.42696e-05	0.000126003	7.15638e-05	0.00487751	7.6187e-05	0.357899	0.00034357	1.40103	0.0016674
15	0.125	0.265465	7.06136	8.70986	0.981806	0.000158688	95.3965	6479.29	0.689636	0.000412903	219.373	158.793	3.69844	0.0716715	20.4946	0.398328		15	0.125	0.000154527	6.25425e-05	0.000107296	7.76643e-05	0.00359356	6.93561e-05	0.263461	0.000158756	1.02918	0.000824504
16	0.136	0.234031	6.22523	7.67852	0.859886	0.000146381	95.1654	6166.62	0.704549	0.000441389	205.215	157.793	3.67424	0.0828335	20.3613	0.459369		16	0.136	0.000142546	6.37236e-05	0.000101117	7.77488e-05	0.00316325	7.9261e-05	0.232265	0.000196085	0.90357	0.000749947
17	0.155	0.133654	3.55519	4.38516	0.495615	6.64567e-05	96.143	7753.45	0.315285	0.000156936	577.174	2144.89	3.7082	0.154434	20.5484	0.85251		17	0.155	6.46801e-05	6.79147e-05	2.05321e-05	7.63015e-05	0.00181522	7.46799e-05	0.132645	0.000138626	0.515498	0.000434484
18	0.185	0.133131	3.54128	4.368	0.482756	0.000107338	93.7904	4791.94	0.497046	0.000401278	225.727	311.635	3.62618	0.134328	20.0964	0.742075		18	0.185	0.000104496	5.88498e-05	5.22943e-05	7.2196e-05	0.00179611	8.02929e-05	0.132126	0.000110591	0.514719	0.000300218
19	0.24	0.14513	3.86047	4.7617	0.538871	8.44473e-05	95.5291	6676.02	0.402396	0.000234421	386.397	1046.02	3.71301	0.156445	20.5749	0.86356		19	0.24	8.21999e-05	7.47089e-05	3.3303e-05	9.01546e-05	0.0019457	8.26344e-05	0.144035	0.000151545	0.564091	0.000447608
Sample:	807E1																	Blank intercepts:
Project:	Himalaya			Irradiation:	FGA013P2H9 (End date: 2013-05-28 11:30:00.0)				Interfering isotope production ratios:			Decay constants:						exp.#	Step	36Ar	±σ36	37Ar	±σ37	38Ar	±σ38	39Ar	±σ39	40Ar	±σ40
Owner:	Stuebner			Measurement Date:	2013-08-21 22:08:38.0															[V]	[V]	[V]	[V]	[V]	[V]	[V]	[V]	[V]	[V]
				Device:	CO2-Laser				ca3637 =	0.000245 +/- 0.000012		lambda40 =	5.5492e-010 +/- 9.3000e-013 1/a					5358	0	-0.00469944	5.5904e-05	-0.00236266	6.07229e-05	-0.00256387	5.29499e-05	0.0311149	5.64418e-05	-0.00424101	0.000279572
				Air:	295.5				ca3937 =	0.000932 +/- 0.000035		lambda39 =	0.002577 +/- 0.000026 1/a
Exp-Nr:	5359			J-Value:	0.0030926		f-value:	0.992586	k3839 =	0.01211 +/- 0.00061		lambda37 =	7.2438 +/- 0.0214 1/a
Material:	3.01 mg Musc			J-Value Error:	5.93485e-06		f-value Error:	0.000202654	k4039 =	0.00183 +/- 0.00009
				Reference Standard(s): FCT01 - 28.305 +/- 0.036 Ma (two standards in neighboring holes)								Fit model: automatic		All errors are 1σ!				Blank corrected intensity intercepts:
Nr.	Step	39Ar(K)	39Ar(K)	39Ar	40Ar*	36Ar_atm	40Ar*	40Ar/36Ar	37Ar/36Ar	37Ar/39Ar	K/Ca	K/Ca	40Ar*/39Ar(K)	40Ar*/39Ar(K)	Age	Age		Nr.	Step	36Ar	±σ36	37Ar	±σ37	38Ar	±σ38	39Ar	±σ39	40Ar	±σ40
		[V]	[%]	[10e-14 mol]	[V]	[V]	[%]					Error		Error	[Ma]	Error [Ma]				[V]	[V]	[V]	[V]	[V]	[V]	[V]	[V]	[V]	[V]
1	0.03	0.00705447	0.305299	0.240392	0.054624	0.00025256	42.2563	511.832	0	0	Inf	Inf	7.74318	3.5213	42.6446	19.1658		1	0.03	0.000245233	8.13686e-05	0	8.48553e-05	0.000119597	7.8075e-05	0.00699795	0.000148613	0.129268	0.00158903
2	0.04	0.0419914	1.81728	1.43092	0.175984	0.000227742	72.3147	1068.57	0	0	Inf	Inf	4.19097	0.531008	23.2064	2.92207		2	0.04	0.000221135	7.22674e-05	0	7.61545e-05	0.000458304	6.58952e-05	0.0416549	0.000513849	0.243359	0.00296266
3	0.05	0.161825	7.00337	5.51444	0.663341	0.000415659	84.3447	1892.07	0.00926858	2.38216e-05	4007.83	94417.4	4.09912	0.1504	22.701	0.829698		3	0.05	0.000403605	7.27079e-05	3.76818e-06	8.87716e-05	0.00165714	7.83146e-05	0.160528	0.00150063	0.786464	0.00801689
4	0.06	0.243664	10.5451	8.3032	1.00985	0.000316875	91.4775	3480.01	0.819311	0.00106729	89.4538	28.9551	4.14446	0.110225	22.9505	0.609306		4	0.06	0.000308019	7.75553e-05	0.000254207	8.22456e-05	0.00245826	7.85165e-05	0.241712	0.00203974	1.10394	0.00957046
5	0.07	0.254652	11.0207	8.67766	1.04674	0.000246383	93.4579	4536.72	1.50123	0.00145626	65.5598	16.0251	4.11048	0.115768	22.7636	0.639697		5	0.07	0.000239715	8.17017e-05	0.000362497	8.85166e-05	0.00256943	8.35771e-05	0.252613	0.00248144	1.12001	0.0120456
6	0.08	0.354566	15.3447	12.0824	1.45626	0.00037834	92.8318	4143.02	0.590082	0.000630523	151.419	57.5788	4.10715	0.0833932	22.7452	0.462544		6	0.08	0.000367654	7.54291e-05	0.000218531	8.30707e-05	0.00357869	8.87317e-05	0.351726	0.00302207	1.56871	0.013809
7	0.086	0.336428	14.5597	11.4643	1.38671	0.000120589	97.4525	11778	1.40476	0.000504769	189.142	99.8158	4.12187	0.0974607	22.8262	0.539439		7	0.086	0.00011731	7.42049e-05	0.000165997	8.75766e-05	0.00335052	9.22944e-05	0.333733	0.00384427	1.42296	0.0176032
8	0.09	0.239626	10.3704	8.1656	0.978774	9.78122e-05	97.0894	10278.2	2.06956	0.000847617	112.637	50.0231	4.0846	0.336984	22.6211	1.85549		8	0.09	9.52377e-05	8.58279e-05	0.00019854	8.74606e-05	0.0023644	0.000142701	0.237707	0.0133442	1.00812	0.0530964
9	0.094	0.22587	9.77507	7.69687	0.922793	0.000106127	96.6714	8977.58	1.41821	0.000668021	142.919	88.8023	4.0855	0.442197	22.6261	2.43432		9	0.094	0.000103243	8.45075e-05	0.00014749	9.11087e-05	0.00225361	0.000188004	0.224061	0.0149641	0.954567	0.0742709
10	0.098	0.0916338	3.96567	3.12256	0.382002	3.10645e-05	97.6115	12575.9	1.30916	0.000444861	214.613	605.786	4.16879	2.55457	23.0844	14.0557		10	0.098	3.02161e-05	9.05932e-05	3.98469e-05	0.000111245	0.000916115	0.000405866	0.0908998	0.0378421	0.39135	0.169544
11	0.106	0.0607331	2.62837	2.06957	0.245352	-4.05346e-09	99.9552	Inf	Inf	5.00163e-05	1908.84	57963.5	4.03984	1.82677	22.3748	10.0552		11	0.106	0	7.7323e-05	2.96928e-06	9.01602e-05	0.000655002	0.000240153	0.0602465	0.0181442	0.245462	0.0793417
12	0.12	0.246027	10.6474	8.38376	0.982895	0.000105511	96.8824	9579.57	2.78608	0.00120001	79.5596	30.6097	3.99506	0.774079	22.1283	4.2617		12	0.12	0.000102833	8.13827e-05	0.000288593	0.000104334	0.00244347	0.000330571	0.244058	0.0320985	1.01452	0.137639
13	0.135	0.0200306	0.866872	0.682573	0.076841	0	99.9523	Inf	NaN	0	Inf	Inf	3.83618	1.41117	21.2534	7.77249		13	0.135	0	8.61164e-05	0	9.09834e-05	0.000197892	7.87355e-05	0.0198701	0.00192224	0.0768776	0.00754267
14	0.165	0.026574	1.15006	0.905551	0.103917	0	99.9532	Inf	NaN	0	Inf	Inf	3.91048	1.00237	21.6626	5.51979		14	0.165	0	7.65194e-05	0	8.38198e-05	0.000224612	7.60902e-05	0.0263611	0.00231799	0.103966	0.00915129
Sample:	807E1																	Blank intercepts:
Project:	Himalaya			Irradiation:	FGA013P2H12 (End date: 2013-05-28 11:30:00.0)				Interfering isotope production ratios:			Decay constants:						exp.#	Step	36Ar	±σ36	37Ar	±σ37	38Ar	±σ38	39Ar	±σ39	40Ar	±σ40
Owner:	Stuebner			Measurement Date:	2013-08-25 09:47:53.0															[V]	[V]	[V]	[V]	[V]	[V]	[V]	[V]	[V]	[V]
				Device:	CO2-Laser				ca3637 =	0.000245 +/- 0.000012		lambda40 =	5.5492e-010 +/- 9.3000e-013 1/a					5378	0	-0.00469271	4.48549e-05	-0.00237803	5.40071e-05	-0.00257824	4.88272e-05	0.0311909	5.03373e-05	-0.00441758	0.000139343
				Air:	295.5				ca3937 =	0.000932 +/- 0.000035		lambda39 =	0.002577 +/- 0.000026 1/a
Exp-Nr:	5379			J-Value:	0.0030926		f-value:	0.993135	k3839 =	0.01211 +/- 0.00061		lambda37 =	7.2438 +/- 0.0214 1/a
Material:	2.99 mg Bt			J-Value Error:	5.93485e-06		f-value Error:	0.000326513	k4039 =	0.00183 +/- 0.00009
				Reference Standard(s): FCT01 - 28.305 +/- 0.036 Ma (two standards in neighboring holes)								Fit model: automatic		All errors are 1σ!				Blank corrected intensity intercepts:
Nr.	Step	39Ar(K)	39Ar(K)	39Ar	40Ar*	36Ar_atm	40Ar*	40Ar/36Ar	37Ar/36Ar	37Ar/39Ar	K/Ca	K/Ca	40Ar*/39Ar(K)	40Ar*/39Ar(K)	Age	Age		Nr.	Step	36Ar	±σ36	37Ar	±σ37	38Ar	±σ38	39Ar	±σ39	40Ar	±σ40
		[V]	[%]	[10e-14 mol]	[V]	[V]	[%]					Error		Error	[Ma]	Error [Ma]				[V]	[V]	[V]	[V]	[V]	[V]	[V]	[V]	[V]	[V]
1	0.03	0.00981904	0.25548	0.322161	0.0478701	0.00031855	33.7067	445.805	0.040795	0.00132438	67.2754	391.459	4.87523	1.85358	26.9672	10.1769		1	0.03	0.000309997	5.98992e-05	1.2732e-05	7.40841e-05	0.000164213	6.47115e-05	0.00974558	9.21845e-05	0.14202	0.000411952
2	0.038	0.0802585	2.08824	2.63327	0.401375	0.000633387	68.1813	929.427	0	0	Inf	Inf	5.00102	0.210555	27.6576	1.15769		2	0.038	0.000616345	5.55802e-05	0	6.95551e-05	0.000996429	6.3644e-05	0.0796575	0.000112688	0.588687	0.00054978
3	0.043	0.142683	3.71246	4.68141	0.70962	0.000510376	82.4471	1686.26	0.0592521	0.000212095	420.087	1133.23	4.9734	0.122804	27.506	0.677631		3	0.043	0.000496686	5.75997e-05	2.9629e-05	7.99269e-05	0.00162935	6.17898e-05	0.141615	0.000132241	0.860698	0.0007379
4	0.046	0.175514	4.56669	5.75859	0.873544	0.000368335	88.8915	2667.77	0.0521815	0.000109585	813.052	3160.39	4.97705	0.102448	27.5261	0.566613		4	0.046	0.000358451	5.90868e-05	1.88312e-05	7.31981e-05	0.00193615	6.20174e-05	0.1742	0.000152552	0.982708	0.000826061
5	0.049	0.152032	3.95572	4.98816	0.752715	0.000220198	92.012	3715.13	0	0	Inf	Inf	4.95102	0.118239	27.3832	0.652725		5	0.049	0.000214273	5.90796e-05	0	7.37849e-05	0.00164697	6.82917e-05	0.150894	0.00015417	0.818062	0.000783196
6	0.054	0.189287	4.92503	6.21046	0.935314	0.000206443	93.8444	4825.76	0.295633	0.000322765	276.047	309.928	4.94126	0.100366	27.3296	0.555271		6	0.054	0.000200973	6.24458e-05	5.98165e-05	6.71573e-05	0.00204035	7.03667e-05	0.18787	0.000165825	0.996664	0.000736819
7	0.062	0.228788	5.9528	7.50648	1.12634	0.000213447	94.6638	5574.31	0.00953288	8.89937e-06	10011.8	423585	4.92309	0.0894925	27.2299	0.4961		7	0.062	0.000207706	6.71694e-05	1.99345e-06	8.43402e-05	0.00248597	6.72309e-05	0.227074	0.000208279	1.18983	0.00139673
8	0.072	0.342738	8.91766	11.2452	1.70222	0.000150191	97.424	11625.2	0.490391	0.00021518	414.065	393.297	4.96654	0.0631388	27.4684	0.35349		8	0.072	0.000146253	7.10207e-05	7.22067e-05	6.85841e-05	0.00369818	6.66519e-05	0.340172	0.000213367	1.74723	0.00130454
9	0.08	0.25933	6.74749	8.50858	1.27079	0.00013326	96.9593	9833.96	0.0892348	4.58891e-05	1941.6	14464.5	4.90028	0.0720565	27.1047	0.401512		9	0.08	0.000129691	6.13584e-05	1.16513e-05	8.67998e-05	0.00277085	7.22256e-05	0.257388	0.00018637	1.31065	0.000988749
10	0.088	0.199088	5.18005	6.53204	0.984617	5.67284e-05	98.2902	17631.8	1.06099	0.00030297	294.084	364.678	4.94564	0.0904443	27.3536	0.501284		10	0.088	5.5286e-05	5.92168e-05	5.90552e-05	7.32307e-05	0.00214374	7.06553e-05	0.197598	0.000132464	1.00174	0.000565899
11	0.098	0.246948	6.42532	8.10233	1.21685	0.00010731	97.425	11612.7	1.59323	0.000694345	128.32	59.4116	4.92755	0.07963	27.2544	0.442556		11	0.098	0.000104661	6.4696e-05	0.000167879	7.77221e-05	0.00264541	7.01026e-05	0.2451	0.000113066	1.24901	0.000488322
12	0.108	0.359755	9.36043	11.8035	1.77721	0.000167003	97.2632	10930	0.719199	0.000334415	266.431	163.52	4.94007	0.0554333	27.3231	0.31208		12	0.108	0.000162677	6.54842e-05	0.000117789	7.22899e-05	0.00389058	7.10029e-05	0.357062	0.000184575	1.82722	0.00103408
13	0.116	0.275251	7.16173	9.03094	1.36519	9.77165e-05	97.8933	14242.2	1.43623	0.000511245	174.277	86.2435	4.95979	0.0755705	27.4313	0.420594		13	0.116	9.52831e-05	6.82336e-05	0.000137776	6.81761e-05	0.00298432	7.29134e-05	0.273191	0.000240593	1.39457	0.0012983
14	0.125	0.223432	5.81345	7.33077	1.1066	8.52653e-05	97.7385	13265	0.714736	0.000273205	326.123	411.714	4.95272	0.0822083	27.3925	0.45656		14	0.125	8.3056e-05	6.04172e-05	5.97651e-05	7.54498e-05	0.00237513	6.91173e-05	0.221759	0.000140616	1.1322	0.000381462
15	0.136	0.25527	6.64184	8.37536	1.27023	5.94175e-05	98.6008	21659.1	0.718695	0.000167563	531.731	1043.37	4.97604	0.0822043	27.5205	0.456556		15	0.136	5.78783e-05	6.90178e-05	4.18785e-05	8.2174e-05	0.00272763	7.92789e-05	0.253359	0.0001623	1.28826	0.000485339
16	0.155	0.351362	9.14205	11.5281	1.7364	0.000109204	98.1398	16183	0.818137	0.000254735	349.768	372.353	4.94192	0.0636155	27.3332	0.356014		16	0.155	0.00010639	7.28622e-05	8.76311e-05	9.32883e-05	0.00375675	7.96226e-05	0.348732	0.000430756	1.76931	0.0022627
17	0.185	0.28918	7.52415	9.48795	1.43431	6.82006e-05	98.5785	21275.5	1.91848	0.000453987	196.257	117.981	4.95993	0.0655314	27.4321	0.366363		17	0.185	6.65483e-05	6.22224e-05	0.000128536	7.72668e-05	0.00311439	6.44376e-05	0.287015	0.000199217	1.455	0.000935465
18	0.24	0.0626247	1.62942	2.05471	0.317735	1.51644e-05	98.5742	21205.6	1.64652	0.000399894	222.805	641.886	5.07363	0.281524	28.0561	1.54635		18	0.24	1.47913e-05	5.80065e-05	2.45191e-05	7.06378e-05	0.00068689	6.63911e-05	0.0621559	0.000116804	0.32233	0.00041957
Sample:	811B1																	Blank intercepts:
Project:	Himalaya			Irradiation:	FGA013P2H13 (End date: 2013-05-28 11:30:00.0)				Interfering isotope production ratios:			Decay constants:						exp.#	Step	36Ar	±σ36	37Ar	±σ37	38Ar	±σ38	39Ar	±σ39	40Ar	±σ40
Owner:	Stuebner			Measurement Date:	2013-08-26 05:59:26.0															[V]	[V]	[V]	[V]	[V]	[V]	[V]	[V]	[V]	[V]
				Device:	CO2-Laser				ca3637 =	0.000245 +/- 0.000012		lambda40 =	5.5492e-010 +/- 9.3000e-013 1/a					5381	0	-0.00473648	4.70525e-05	-0.00240757	5.23787e-05	-0.00255487	4.16295e-05	0.0312825	6.15357e-05	-0.00436429	0.000118983
				Air:	295.5				ca3937 =	0.000932 +/- 0.000035		lambda39 =	0.002577 +/- 0.000026 1/a
Exp-Nr:	5382			J-Value:	0.0030926		f-value:	0.993203	k3839 =	0.01211 +/- 0.00061		lambda37 =	7.2438 +/- 0.0214 1/a
Material:	2.97 mg Bt			J-Value Error:	5.93485e-06		f-value Error:	0.000411914	k4039 =	0.00183 +/- 0.00009
				Reference Standard(s): FCT01 - 28.305 +/- 0.036 Ma (two standards in neighboring holes)								Fit model: automatic		All errors are 1σ!				Blank corrected intensity intercepts:
Nr.	Step	39Ar(K)	39Ar(K)	39Ar	40Ar*	36Ar_atm	40Ar*	40Ar/36Ar	37Ar/36Ar	37Ar/39Ar	K/Ca	K/Ca	40Ar*/39Ar(K)	40Ar*/39Ar(K)	Age	Age		Nr.	Step	36Ar	±σ36	37Ar	±σ37	38Ar	±σ38	39Ar	±σ39	40Ar	±σ40
		[V]	[%]	[10e-14 mol]	[V]	[V]	[%]					Error		Error	[Ma]	Error [Ma]				[V]	[V]	[V]	[V]	[V]	[V]	[V]	[V]	[V]	[V]
1	0.03	0.0078969	0.221653	0.259096	0.0340896	0.00108575	9.60426	326.907	0.00833863	0.00114721	76.3799	580.355	4.31683	2.18958	23.8987	12.0421		1	0.03	0.00105683	5.69027e-05	8.87161e-06	6.74087e-05	0.000316112	6.12856e-05	0.00783831	8.84065e-05	0.354942	0.000358517
2	0.038	0.0387702	1.08822	1.27205	0.222604	0.000884671	45.9836	547.183	0.0258156	0.000589461	148.652	483.919	5.74163	0.531518	31.7176	2.91161		2	0.038	0.000861131	6.7816e-05	2.23797e-05	7.28544e-05	0.000627434	6.08032e-05	0.0384825	8.85982e-05	0.484096	0.000569756
3	0.046	0.100659	2.82534	3.3026	0.621162	0.000912291	69.7208	976.578	0.0037157	3.36976e-05	2600.32	65611.9	6.17096	0.179622	34.067	0.986082		3	0.046	0.000887988	5.93262e-05	3.32163e-06	8.38121e-05	0.00134883	6.44527e-05	0.0999115	0.000151404	0.890929	0.00117106
4	0.054	0.170583	4.78798	5.59678	1.06621	0.000679652	84.1285	1864.7	0.0065224	2.60039e-05	3369.68	55602.8	6.2504	0.116322	34.5014	0.64196		4	0.054	0.000661549	6.49757e-05	4.34382e-06	7.1677e-05	0.00213818	6.68794e-05	0.169316	0.000201378	1.26736	0.00164455
5	0.062	0.207462	5.82311	6.80678	1.32141	0.000408511	91.6053	3530.88	0.0507146	9.99323e-05	876.84	3296.04	6.36944	0.0951632	35.1521	0.527677		5	0.062	0.000397656	6.45928e-05	2.03022e-05	7.63158e-05	0.00254845	6.36454e-05	0.205921	0.000224371	1.44251	0.00167993
6	0.07	0.277555	7.79053	9.10654	1.75717	0.000353451	94.3638	5267.21	0.156517	0.000199487	439.25	587.422	6.33088	0.0670195	34.9414	0.376879		6	0.07	0.000344111	6.08241e-05	5.42205e-05	7.25102e-05	0.00336832	6.62555e-05	0.275494	0.000230638	1.86212	0.00152261
7	0.076	0.226448	6.35603	7.42971	1.44013	0.000157467	96.8431	9441.63	0.153462	0.000106806	820.412	2453.84	6.35966	0.0834981	35.0987	0.464949		7	0.076	0.000153305	6.21182e-05	2.36843e-05	7.08392e-05	0.00273377	5.91086e-05	0.224766	0.000151235	1.48708	0.000754177
8	0.081	0.198545	5.57284	6.51423	1.25911	0.000144078	96.7023	9033.01	0.314223	0.000228271	383.863	651.091	6.34171	0.0994442	35.0006	0.550736		8	0.081	0.000140303	6.48367e-05	4.43821e-05	7.52786e-05	0.00238117	7.07437e-05	0.197071	0.000186514	1.30205	0.000827228
9	0.086	0.18831	5.28556	6.17841	1.18866	0.000146108	96.4681	8429.15	0.338367	0.000262832	333.386	583.883	6.31223	0.112621	34.8395	0.621923		9	0.086	0.000142285	6.97056e-05	4.84675e-05	8.48842e-05	0.00223612	6.82683e-05	0.186912	0.000160241	1.23218	0.000807084
10	0.091	0.195764	5.49478	6.42298	1.23489	0.000136853	96.8019	9320.81	0.055551	3.88619e-05	2254.77	24497.2	6.30804	0.109766	34.8166	0.606478		10	0.091	0.000133217	7.06914e-05	7.44999e-06	8.09412e-05	0.00233712	7.52544e-05	0.19431	0.000133854	1.27568	0.000412148
11	0.097	0.265118	7.44144	8.69848	1.68342	0.00013051	97.7328	13190.9	0.368044	0.00018139	483.073	736.343	6.3497	0.0840164	35.0442	0.467717		11	0.097	0.000127101	7.31133e-05	4.70925e-05	7.17821e-05	0.00317378	6.42538e-05	0.263149	0.000214323	1.72247	0.00104371
12	0.103	0.282601	7.93215	9.27208	1.79266	0.000144714	97.6426	12678.8	0.429568	0.00022025	397.842	430.524	6.34345	0.0705267	35.0101	0.395563		12	0.103	0.000140946	6.52022e-05	6.0952e-05	6.59583e-05	0.0033518	6.16085e-05	0.280502	0.000267037	1.83594	0.00139284
13	0.109	0.236582	6.64047	7.76221	1.51079	0.000136299	97.3761	11376.8	0.378253	0.000218177	401.621	574.294	6.38591	0.0925228	35.2422	0.513473		13	0.109	0.000132741	7.12759e-05	5.05463e-05	7.22776e-05	0.00282015	6.35526e-05	0.234825	0.000361636	1.5515	0.00225765
14	0.117	0.234112	6.57113	7.68116	1.49946	0.000119761	97.667	12813.8	0.306758	0.000157094	557.786	1172.81	6.40491	0.0905696	35.346	0.502983		14	0.117	0.000116622	6.38845e-05	3.60147e-05	7.57246e-05	0.0027881	6.38238e-05	0.232373	0.0009552	1.53528	0.00592013
15	0.127	0.244528	6.8635	8.02291	1.57684	8.54291e-05	98.3968	18743.2	0.563535	0.000197165	444.423	740.824	6.44851	0.0972262	35.5842	0.538849		15	0.127	8.3221e-05	6.75508e-05	4.72124e-05	7.86991e-05	0.00293919	7.39509e-05	0.242712	0.0013107	1.60253	0.00846878
16	0.139	0.21799	6.11863	7.15222	1.40219	8.57806e-05	98.1969	16633.4	0.536016	0.000211224	414.841	726.528	6.43235	0.102455	35.4959	0.567026		16	0.139	8.35601e-05	7.29466e-05	4.509e-05	7.89674e-05	0.00263265	7.46199e-05	0.216371	0.000295489	1.42794	0.00208975
17	0.155	0.228937	6.42591	7.5114	1.47493	8.22058e-05	98.3522	18228.4	0.532875	0.000191612	457.302	761.877	6.4425	0.0847208	35.5514	0.471612		17	0.155	8.00775e-05	6.17858e-05	4.29575e-05	7.15678e-05	0.00270331	5.92214e-05	0.227238	0.000542291	1.49964	0.00340375
18	0.185	0.169337	4.75302	5.55592	1.09545	8.94982e-05	97.6157	12529	0.537875	0.000284681	307.799	522.648	6.46901	0.123525	35.6963	0.680943		18	0.185	8.71818e-05	6.83309e-05	4.72073e-05	8.01583e-05	0.00206076	6.83204e-05	0.16808	0.000291873	1.1222	0.00183691
19	0.24	0.071529	2.0077	2.34685	0.463526	4.55651e-05	97.1505	10461.2	0.654381	0.000417512	209.873	517.884	6.48026	0.300733	35.7577	1.64557		19	0.24	4.43933e-05	7.06943e-05	2.92449e-05	7.21647e-05	0.000848252	6.63036e-05	0.0709979	0.000164288	0.477121	0.000959514
Sample:	812D2																	Blank intercepts:
Project:	Himalaya			Irradiation:	FGA013P2H10 (End date: 2013-05-28 11:30:00.0)				Interfering isotope production ratios:			Decay constants:						exp.#	Step	36Ar	±σ36	37Ar	±σ37	38Ar	±σ38	39Ar	±σ39	40Ar	±σ40
Owner:	Stuebner			Measurement Date:	2013-08-23 04:22:25.0															[V]	[V]	[V]	[V]	[V]	[V]	[V]	[V]	[V]	[V]
				Device:	CO2-Laser				ca3637 =	0.000245 +/- 0.000012		lambda40 =	5.5492e-010 +/- 9.3000e-013 1/a					5372	0	-0.00473351	4.81468e-05	-0.00237758	6.02789e-05	-0.00257292	5.99443e-05	0.0312762	6.8234e-05	-0.0039711	0.000132227
				Air:	295.5				ca3937 =	0.000932 +/- 0.000035		lambda39 =	0.002577 +/- 0.000026 1/a
Exp-Nr:	5373			J-Value:	0.0030926		f-value:	0.992955	k3839 =	0.01211 +/- 0.00061		lambda37 =	7.2438 +/- 0.0214 1/a
Material:	3.04 mg Musc			J-Value Error:	5.93485e-06		f-value Error:	0.000215264	k4039 =	0.00183 +/- 0.00009
				Reference Standard(s): FCT01 - 28.305 +/- 0.036 Ma (two standards in neighboring holes)								Fit model: automatic		All errors are 1σ!				Blank corrected intensity intercepts:
Nr.	Step	39Ar(K)	39Ar(K)	39Ar	40Ar*	36Ar_atm	40Ar*	40Ar/36Ar	37Ar/36Ar	37Ar/39Ar	K/Ca	K/Ca	40Ar*/39Ar(K)	40Ar*/39Ar(K)	Age	Age		Nr.	Step	36Ar	±σ36	37Ar	±σ37	38Ar	±σ38	39Ar	±σ39	40Ar	±σ40
		[V]	[%]	[10e-14 mol]	[V]	[V]	[%]					Error		Error	[Ma]	Error [Ma]				[V]	[V]	[V]	[V]	[V]	[V]	[V]	[V]	[V]	[V]
1	0.03	0.00824912	0.200174	0.270652	0.0388771	0.000259815	33.6111	445.192	0	0	Inf	Inf	4.71288	2.98082	26.0756	16.3737		1	0.03	0.000252645	8.0896e-05	0	8.03381e-05	0.000148505	8.5721e-05	0.00818599	0.000103299	0.115668	0.000210969
2	0.04	0.114305	2.77373	3.75032	0.416775	0.000981228	58.955	720.419	0.0428553	0.00036813	252.95	462.083	3.64618	0.189823	20.2066	1.04736		2	0.04	0.000954205	7.1348e-05	4.11768e-05	7.52204e-05	0.00131845	8.52713e-05	0.11343	0.000148242	0.706937	0.000570414
3	0.05	0.215994	5.24132	7.08671	0.768272	0.00100541	72.0864	1060	0.0257378	0.000119882	776.752	2412.86	3.55692	0.100527	19.7147	0.556404		3	0.05	0.000977695	7.13002e-05	2.53386e-05	7.87104e-05	0.00230489	7.84889e-05	0.214341	0.000228219	1.06577	0.00111076
4	0.06	0.225527	5.47266	7.39951	0.800035	0.000492958	84.5599	1919.11	0.0613353	0.00013416	694.086	2095.53	3.5474	0.0935816	19.6622	0.518288		4	0.06	0.000479393	6.9296e-05	2.9608e-05	8.93903e-05	0.00229032	7.66142e-05	0.223801	0.000213542	0.946117	0.00116405
5	0.07	0.296032	7.18355	9.71277	1.03155	0.000788442	81.5406	1604.35	0.080432	0.000214374	434.374	618.921	3.48459	0.0716238	19.3159	0.397944		5	0.07	0.000766767	6.964e-05	6.2101e-05	8.84846e-05	0.00307166	7.76923e-05	0.293767	0.000237557	1.26508	0.000959626
6	0.078	0.263885	6.40347	8.65803	0.912408	0.000750441	80.4134	1511.64	0.162404	0.000462231	201.454	138.882	3.45759	0.0831677	19.167	0.461172		6	0.078	0.000729892	7.20867e-05	0.000119361	8.22852e-05	0.00276614	7.91431e-05	0.261867	0.000251169	1.13465	0.000968019
7	0.084	0.252042	6.11606	8.26944	0.875184	0.000656713	81.8155	1628.12	0.338332	0.000882494	105.517	42.3601	3.47238	0.0871291	19.2486	0.482898		7	0.084	0.000638886	7.22143e-05	0.000217657	8.73719e-05	0.00262911	8.1583e-05	0.250114	0.000146309	1.0697	0.000583575
8	0.089	0.272313	6.60796	8.93452	0.947979	0.00088317	78.3807	1368.83	0.326179	0.00105899	87.9314	24.2269	3.48122	0.0756178	19.2973	0.419805		8	0.089	0.000859181	6.76987e-05	0.000282193	7.77363e-05	0.00287761	7.78131e-05	0.27023	0.000172746	1.20945	0.000564144
9	0.093	0.285049	6.91702	9.35241	0.998302	0.000665005	83.5167	1796.56	0.37473	0.000875206	106.396	35.9239	3.50221	0.071682	19.4131	0.398272		9	0.093	0.000646985	6.71488e-05	0.000244129	8.2419e-05	0.00294629	7.61885e-05	0.282869	0.000185356	1.19533	0.000780505
10	0.096	0.249692	6.05904	8.19234	0.867232	0.000477365	85.9709	2112.11	0.36493	0.000698453	133.321	62.1188	3.47321	0.0830914	19.2532	0.460755		10	0.096	0.000464423	6.81238e-05	0.000170659	7.95111e-05	0.00254513	8.38647e-05	0.247782	0.000252042	1.00875	0.00102432
11	0.099	0.250007	6.06668	8.20267	0.86687	0.000387457	88.2921	2532.81	0.34615	0.00053704	173.392	98.1245	3.46739	0.092451	19.2211	0.512101		11	0.099	0.000376942	7.58971e-05	0.000131385	7.43493e-05	0.00255232	8.13841e-05	0.248094	0.000323878	0.981821	0.000972898
12	0.102	0.218567	5.30377	7.17114	0.747666	0.000296155	89.4787	2819.45	0.511776	0.000694359	134.107	87.2813	3.42076	0.110438	18.964	0.610936		12	0.102	0.000288184	7.9197e-05	0.00014851	9.66522e-05	0.00228299	9.11849e-05	0.216895	0.000388005	0.83558	0.00126835
13	0.106	0.218286	5.29695	7.16193	0.749036	0.000258094	90.715	3196.73	0.570435	0.0006754	137.871	79.5313	3.43144	0.0949674	19.0228	0.525926		13	0.106	0.000251167	6.67587e-05	0.00014427	8.32171e-05	0.00223035	8.21187e-05	0.216616	0.00082425	0.825702	0.00316466
14	0.111	0.202013	4.90207	6.62802	0.68013	0.000283631	88.9858	2692.39	0.638196	0.000897369	103.768	45.2471	3.36676	0.0964076	18.6661	0.533858		14	0.111	0.000276044	6.04243e-05	0.000177394	7.73377e-05	0.00210582	8.49229e-05	0.200468	0.00127115	0.764313	0.00484804
15	0.118	0.181657	4.4081	5.96013	0.617734	0.000261333	88.8455	2657.97	0.708875	0.0010214	91.1667	48.0252	3.40056	0.135437	18.8525	0.748478		15	0.118	0.000254368	7.94304e-05	0.000181568	9.56381e-05	0.00193762	8.8993e-05	0.180268	0.000924036	0.69529	0.00355338
16	0.128	0.212212	5.14955	6.96263	0.725117	0.000349686	87.486	2368.31	0.592874	0.000978335	95.1802	41.926	3.41695	0.102134	18.9429	0.565296		16	0.128	0.000340311	6.92263e-05	0.000203164	8.94812e-05	0.00221079	8.04093e-05	0.210589	0.000938194	0.828837	0.00409096
17	0.14	0.238823	5.7953	7.83574	0.818533	0.000336215	89.1336	2728.02	0.890937	0.00125655	74.1059	20.2395	3.42736	0.103188	19.0004	0.571086		17	0.14	0.000327336	7.69247e-05	0.000293661	8.01684e-05	0.00252539	9.03173e-05	0.236997	0.00147714	0.918322	0.00589837
18	0.154	0.195205	4.73687	6.40465	0.658351	0.000252078	89.7918	2904.7	0.983426	0.00127243	73.1815	26.6926	3.37261	0.137938	18.6984	0.762283		18	0.154	0.000245451	8.60396e-05	0.00024306	8.8634e-05	0.00203126	9.26593e-05	0.193713	0.00118979	0.733197	0.00500176
19	0.17	0.11184	2.71392	3.66946	0.372275	0.00014132	89.8695	2923.88	1.82911	0.00231844	40.1639	13.3051	3.32864	0.1968	18.4559	1.08662		19	0.17	0.000137765	7.15579e-05	0.000253738	8.40312e-05	0.00114994	7.91993e-05	0.110986	0.000686764	0.41424	0.00250304
20	0.2	0.10928	2.6518	3.58546	0.396007	0.000132296	90.9733	3279.76	2.35062	0.00285659	32.5974	8.22518	3.62378	0.188452	20.0832	1.03987		20	0.2	0.00012906	6.67344e-05	0.00030548	7.70382e-05	0.00115285	8.47712e-05	0.108445	0.000717435	0.435301	0.00244453
Calculation of same sample (812D2 Ms) with atm. correction 40/36 = 334.0
Sample:	812D2																	Blank intercepts:
Project:	Himalaya			Irradiation:	FGA013P2H10 (End date: 2013-05-28 11:30:00.0)				Interfering isotope production ratios:			Decay constants:						exp.#	Step	36Ar	±σ36	37Ar	±σ37	38Ar	±σ38	39Ar	±σ39	40Ar	±σ40
Owner:	Stuebner			Measurement Date:	2013-08-23 04:22:25.0															[V]	[V]	[V]	[V]	[V]	[V]	[V]	[V]	[V]	[V]
				Device:	CO2-Laser				ca3637 =	0.000245 +/- 0.000012		lambda40 =	5.5492e-010 +/- 9.3000e-013 1/a					5372	0	-0.00473351	4.81468e-05	-0.00237758	6.02789e-05	-0.00257292	5.99443e-05	0.0312762	6.8234e-05	-0.0039711	0.000132227
				Air:	334				ca3937 =	0.000932 +/- 0.000035		lambda39 =	0.002577 +/- 0.000026 1/a
Exp-Nr:	5373			J-Value:	0.0030926		f-value:	0.992955	k3839 =	0.01211 +/- 0.00061		lambda37 =	7.2438 +/- 0.0214 1/a
Material:	3.04 mg Musc			J-Value Error:	5.93485e-06		f-value Error:	0.000215264	k4039 =	0.00183 +/- 0.00009
				Reference Standard(s): FCT01 - 28.305 +/- 0.036 Ma (two standards in neighboring holes)								Fit model: automatic		All errors are 1σ!				Blank corrected intensity intercepts:
Nr.	Step	39Ar(K)	39Ar(K)	39Ar	40Ar*	36Ar_atm	40Ar*	40Ar/36Ar	37Ar/36Ar	37Ar/39Ar	K/Ca	K/Ca	40Ar*/39Ar(K)	40Ar*/39Ar(K)	Age	Age		Nr.	Step	36Ar	±σ36	37Ar	±σ37	38Ar	±σ38	39Ar	±σ39	40Ar	±σ40
		[V]	[%]	[10e-14 mol]	[V]	[V]	[%]					Error		Error	[Ma]	Error [Ma]				[V]	[V]	[V]	[V]	[V]	[V]	[V]	[V]	[V]	[V]
1	0.03	0.00824912	0.200174	0.270652	0.0288743	0.000259815	24.9631	445.192	0	0	Inf	Inf	3.50028	3.36877	19.4024	18.5734		1	0.03	0.000252645	8.0896e-05	0	8.03381e-05	0.000148505	8.5721e-05	0.00818599	0.000103299	0.115668	0.000210969
2	0.04	0.114305	2.77373	3.75032	0.378998	0.000981228	53.6112	720.419	0.0428553	0.00036813	252.95	462.083	3.31568	0.214514	18.3844	1.18429		2	0.04	0.000954205	7.1348e-05	4.11768e-05	7.52204e-05	0.00131845	8.52713e-05	0.11343	0.000148242	0.706937	0.000570414
3	0.05	0.215994	5.24132	7.08671	0.729564	0.00100541	68.4545	1060	0.0257378	0.000119882	776.752	2412.86	3.37771	0.113567	18.7265	0.628178		3	0.05	0.000977695	7.13002e-05	2.53386e-05	7.87104e-05	0.00230489	7.84889e-05	0.214341	0.000228219	1.06577	0.00111076
4	0.06	0.225527	5.47266	7.39951	0.781056	0.000492958	82.5539	1919.11	0.0613353	0.00013416	694.086	2095.53	3.46325	0.105721	19.1982	0.58498		4	0.06	0.000479393	6.9296e-05	2.9608e-05	8.93903e-05	0.00229032	7.66142e-05	0.223801	0.000213542	0.946117	0.00116405
5	0.07	0.296032	7.18355	9.71277	1.0012	0.000788442	79.1411	1604.35	0.080432	0.000214374	434.374	618.921	3.38205	0.0809199	18.7505	0.448838		5	0.07	0.000766767	6.964e-05	6.2101e-05	8.84846e-05	0.00307166	7.76923e-05	0.293767	0.000237557	1.26508	0.000959626
6	0.078	0.263885	6.40347	8.65803	0.883516	0.000750441	77.8671	1511.64	0.162404	0.000462231	201.454	138.882	3.3481	0.0939627	18.5632	0.520434		6	0.078	0.000729892	7.20867e-05	0.000119361	8.22852e-05	0.00276614	7.91431e-05	0.261867	0.000251169	1.13465	0.000968019
7	0.084	0.252042	6.11606	8.26944	0.8499	0.000656713	79.4519	1628.12	0.338332	0.000882494	105.517	42.3601	3.37206	0.0984654	18.6954	0.545162		7	0.084	0.000638886	7.22143e-05	0.000217657	8.73719e-05	0.00262911	8.1583e-05	0.250114	0.000146309	1.0697	0.000583575
8	0.089	0.272313	6.60796	8.93452	0.913977	0.00088317	75.5694	1368.83	0.326179	0.00105899	87.9314	24.2269	3.35635	0.0854516	18.6087	0.473699		8	0.089	0.000859181	6.76987e-05	0.000282193	7.77363e-05	0.00287761	7.78131e-05	0.27023	0.000172746	1.20945	0.000564144
9	0.093	0.285049	6.91702	9.35241	0.972699	0.000665005	81.3748	1796.56	0.37473	0.000875206	106.396	35.9239	3.41239	0.0809966	18.9178	0.449262		9	0.093	0.000646985	6.71488e-05	0.000244129	8.2419e-05	0.00294629	7.61885e-05	0.282869	0.000185356	1.19533	0.000780505
10	0.096	0.249692	6.05904	8.19234	0.848853	0.000477365	84.149	2112.11	0.36493	0.000698453	133.321	62.1188	3.39961	0.0938701	18.8473	0.51991		10	0.096	0.000464423	6.81238e-05	0.000170659	7.95111e-05	0.00254513	8.38647e-05	0.247782	0.000252042	1.00875	0.00102432
11	0.099	0.250007	6.06668	8.20267	0.851953	0.000387457	86.7727	2532.81	0.34615	0.00053704	173.392	98.1245	3.40772	0.104445	18.8921	0.578001		11	0.099	0.000376942	7.58971e-05	0.000131385	7.43493e-05	0.00255232	8.13841e-05	0.248094	0.000323878	0.981821	0.000972898
12	0.102	0.218567	5.30377	7.17114	0.736264	0.000296155	88.1141	2819.45	0.511776	0.000694359	134.107	87.2813	3.3686	0.124742	18.6763	0.689662		12	0.102	0.000288184	7.9197e-05	0.00014851	9.66522e-05	0.00228299	9.11849e-05	0.216895	0.000388005	0.83558	0.00126835
13	0.106	0.218286	5.29695	7.16193	0.739099	0.000258094	89.5116	3196.73	0.570435	0.0006754	137.871	79.5313	3.38592	0.106825	18.7718	0.591101		13	0.106	0.000251167	6.67587e-05	0.00014427	8.32171e-05	0.00223035	8.21187e-05	0.216616	0.00082425	0.825702	0.00316466
14	0.111	0.202013	4.90207	6.62802	0.669211	0.000283631	87.5571	2692.39	0.638196	0.000897369	103.768	45.2471	3.31271	0.107578	18.368	0.595291		14	0.111	0.000276044	6.04243e-05	0.000177394	7.73377e-05	0.00210582	8.49229e-05	0.200468	0.00127115	0.764313	0.00484804
15	0.118	0.181657	4.4081	5.96013	0.607673	0.000261333	87.3984	2657.97	0.708875	0.0010214	91.1667	48.0252	3.34517	0.152427	18.547	0.842103		15	0.118	0.000254368	7.94304e-05	0.000181568	9.56381e-05	0.00193762	8.8993e-05	0.180268	0.000924036	0.69529	0.00355338
16	0.128	0.212212	5.14955	6.96263	0.711654	0.000349686	85.8617	2368.31	0.592874	0.000978335	95.1802	41.926	3.35351	0.114675	18.593	0.63429		16	0.128	0.000340311	6.92263e-05	0.000203164	8.94812e-05	0.00221079	8.04093e-05	0.210589	0.000938194	0.828837	0.00409096
17	0.14	0.238823	5.7953	7.83574	0.805589	0.000336215	87.724	2728.02	0.890937	0.00125655	74.1059	20.2395	3.37316	0.115294	18.7015	0.637678		17	0.14	0.000327336	7.69247e-05	0.000293661	8.01684e-05	0.00252539	9.03173e-05	0.236997	0.00147714	0.918322	0.00589837
18	0.154	0.195205	4.73687	6.40465	0.648646	0.000252078	88.4681	2904.7	0.983426	0.00127243	73.1815	26.6926	3.32289	0.154899	18.4242	0.855762		18	0.154	0.000245451	8.60396e-05	0.00024306	8.8634e-05	0.00203126	9.26593e-05	0.193713	0.00118979	0.733197	0.00500176
19	0.17	0.11184	2.71392	3.66946	0.366835	0.00014132	88.556	2923.88	1.82911	0.00231844	40.1639	13.3051	3.27999	0.221835	18.1875	1.22476		19	0.17	0.000137765	7.15579e-05	0.000253738	8.40312e-05	0.00114994	7.91993e-05	0.110986	0.000686764	0.41424	0.00250304
20	0.2	0.10928	2.6518	3.58546	0.390914	0.000132296	89.8032	3279.76	2.35062	0.00285659	32.5974	8.22518	3.57717	0.212268	19.8263	1.17112		20	0.2	0.00012906	6.67344e-05	0.00030548	7.70382e-05	0.00115285	8.47712e-05	0.108445	0.000717435	0.435301	0.00244453
Sample:	812D2																	Blank intercepts:
Project:	Pamir			Irradiation:	FGA013P2H15 (End date: 2013-05-28 11:30:00.0)				Interfering isotope production ratios:			Decay constants:						exp.#	Step	36Ar	±σ36	37Ar	±σ37	38Ar	±σ38	39Ar	±σ39	40Ar	±σ40
Owner:	Stuebner			Measurement Date:	2013-08-27 05:55:03.0															[V]	[V]	[V]	[V]	[V]	[V]	[V]	[V]	[V]	[V]
				Device:	CO2-Laser				ca3637 =	0.000245 +/- 0.000012		lambda40 =	5.5492e-010 +/- 9.3000e-013 1/a					5384	0	-0.00475855	5.63862e-05	-0.0024146	5.85111e-05	-0.00257187	4.78875e-05	0.0313023	6.53366e-05	-0.00416424	0.00013069
				Air:	295.5				ca3937 =	0.000932 +/- 0.000035		lambda39 =	0.002577 +/- 0.000026 1/a
Exp-Nr:	5385			J-Value:	0.0030926		f-value:	0.993283	k3839 =	0.01211 +/- 0.00061		lambda37 =	7.2438 +/- 0.0214 1/a
Material:	3.05 mg Bt			J-Value Error:	5.93485e-06		f-value Error:	0.000522498	k4039 =	0.00183 +/- 0.00009
				Reference Standard(s): FCT01 - 28.305 +/- 0.036 Ma (two standards in neighboring holes)								Fit model: automatic		All errors are 1σ!				Blank corrected intensity intercepts:
Nr.	Step	39Ar(K)	39Ar(K)	39Ar	40Ar*	36Ar_atm	40Ar*	40Ar/36Ar	37Ar/36Ar	37Ar/39Ar	K/Ca	K/Ca	40Ar*/39Ar(K)	40Ar*/39Ar(K)	Age	Age		Nr.	Step	36Ar	±σ36	37Ar	±σ37	38Ar	±σ38	39Ar	±σ39	40Ar	±σ40
		[V]	[%]	[10e-14 mol]	[V]	[V]	[%]					Error		Error	[Ma]	Error [Ma]				[V]	[V]	[V]	[V]	[V]	[V]	[V]	[V]	[V]	[V]
1	0.03	0.0187329	0.502148	0.614623	0.0747144	0.00234853	9.71907	327.327	0.00136271	0.000170951	502.539	12661.1	3.9884	1.17481	22.0916	6.46774		1	0.03	0.00228669	7.23242e-05	3.13673e-06	7.90279e-05	0.000637063	6.37965e-05	0.0185952	9.28696e-05	0.76874	0.000587693
2	0.038	0.16102	4.31626	5.28305	0.729944	0.00355582	40.9854	500.861	0.00415585	9.18331e-05	935.498	5299.84	4.53324	0.14184	25.0885	0.782147		2	0.038	0.0034622	7.47463e-05	1.44837e-05	8.2054e-05	0.00244941	6.61395e-05	0.159837	0.000138036	1.78098	0.00133185
3	0.042	0.215802	5.78472	7.08042	0.988819	0.00181114	64.8659	841.644	0.0316853	0.000266105	322.841	436.87	4.58207	0.101226	25.3569	0.559965		3	0.042	0.00176352	7.12618e-05	5.62482e-05	7.61145e-05	0.00271119	6.93554e-05	0.214215	0.000322121	1.52441	0.00239706
4	0.044	0.183302	4.91353	6.0141	0.836788	0.000786977	78.2282	1359.14	0.0386297	0.000165966	517.634	1284.32	4.56508	0.127475	25.2636	0.703462		4	0.044	0.000766296	7.67759e-05	2.9798e-05	7.39327e-05	0.00215006	6.89141e-05	0.181954	0.000200344	1.06968	0.00133431
5	0.046	0.176796	4.73915	5.80066	0.800495	0.000510517	84.1142	1863.95	0.0693999	0.000200548	428.375	940.697	4.52778	0.130971	25.0585	0.722632		5	0.046	0.000497124	7.61353e-05	3.4729e-05	7.62633e-05	0.00205115	6.76414e-05	0.175497	0.000202629	0.951676	0.00105925
6	0.049	0.179097	4.80081	5.87613	0.815635	0.000358507	88.4731	2571.05	0.117546	0.000235489	364.814	772.113	4.55416	0.121221	25.2035	0.669253		6	0.049	0.000349127	7.12971e-05	4.13103e-05	8.74311e-05	0.00202849	7.40481e-05	0.17778	0.000244918	0.921902	0.00127778
7	0.055	0.24072	6.45266	7.89797	1.09303	0.000416923	89.8377	2917.31	0.208475	0.000361418	237.701	230.493	4.54067	0.0878376	25.1294	0.486939		7	0.055	0.000406069	6.95075e-05	8.52163e-05	8.26308e-05	0.00276838	7.16202e-05	0.23895	0.000190101	1.21667	0.000962711
8	0.063	0.164116	4.39924	5.38461	0.738226	0.000210549	92.1925	3802.25	0.153302	0.000196846	436.43	981.65	4.4982	0.133401	24.896	0.73597		8	0.063	0.000205051	7.20909e-05	3.1643e-05	7.11736e-05	0.00185225	7.02841e-05	0.162909	0.000119693	0.800744	0.000398567
9	0.073	0.20034	5.37024	6.5731	0.897521	0.000234409	92.8001	4125.25	0.112792	0.000132079	650.441	2086.89	4.48	0.118538	24.7959	0.654622		9	0.073	0.000228274	7.81805e-05	2.5918e-05	8.31557e-05	0.00225758	7.34715e-05	0.198867	0.000162111	0.967156	0.000443488
10	0.083	0.220308	5.90551	7.22827	1.00082	0.000215495	93.9824	4939.76	0.258551	0.000253161	339.348	473.976	4.54281	0.0914347	25.1411	0.506545		10	0.083	0.0002099	6.60812e-05	5.46296e-05	7.63018e-05	0.00247106	7.2621e-05	0.218689	0.000278873	1.0649	0.00128046
11	0.093	0.241092	6.46265	7.9102	1.08569	0.000239567	93.8428	4826.99	0.309576	0.000307955	278.968	320.782	4.5032	0.101551	24.9234	0.561746		11	0.093	0.000233366	8.05878e-05	7.27231e-05	8.36225e-05	0.00270034	6.82096e-05	0.23932	0.000180971	1.15692	0.00046166
12	0.102	0.302422	8.10664	9.92243	1.38113	0.000241081	95.0587	6022.95	0.41978	0.000335057	256.403	204.224	4.56689	0.072054	25.2735	0.401129		12	0.102	0.000234878	7.14911e-05	9.92507e-05	7.90509e-05	0.00334755	7.39744e-05	0.300199	0.000311223	1.45292	0.00121443
13	0.11	0.311699	8.3553	10.2268	1.42287	0.000277323	94.5184	5426.18	0.263501	0.000234682	366.068	440.182	4.5649	0.0803318	25.2625	0.446092		13	0.11	0.000270125	8.12133e-05	7.16499e-05	8.6155e-05	0.00351143	7.09184e-05	0.309407	0.000699736	1.50539	0.0029182
14	0.118	0.283343	7.59519	9.29642	1.29452	0.000222636	95.1274	6109.2	0.347423	0.000273302	314.339	316.125	4.56874	0.0783005	25.2837	0.435051		14	0.118	0.000216884	7.1549e-05	7.58501e-05	7.62797e-05	0.00317709	6.4188e-05	0.28126	0.000615897	1.36083	0.00348854
15	0.126	0.233388	6.25613	7.65743	1.05968	0.000205354	94.5477	5454.25	0.442323	0.000389696	220.453	198.44	4.54041	0.0911561	25.128	0.505026		15	0.126	0.000200077	6.90299e-05	8.90853e-05	8.01879e-05	0.00265281	6.65294e-05	0.231673	0.000587635	1.12079	0.00248145
16	0.136	0.196226	5.25998	6.43815	0.887457	0.000187447	94.0893	5029.23	0.351489	0.000336153	255.567	319.074	4.52262	0.110634	25.0302	0.611376		16	0.136	0.000182606	7.03548e-05	6.46093e-05	8.06632e-05	0.0021858	7.05629e-05	0.194784	0.000623025	0.943207	0.00266327
17	0.153	0.252862	6.77815	8.29636	1.12939	0.000244697	93.9467	4909.5	0.458898	0.000444667	193.2	131.057	4.46642	0.0884594	24.7213	0.490304		17	0.153	0.000238416	7.19172e-05	0.000110134	7.47059e-05	0.00282293	6.58768e-05	0.251004	0.000752243	1.20216	0.00347951
18	0.2	0.149285	4.00169	4.89801	0.661559	0.000188955	92.1817	3793.09	0.887076	0.001125	76.364	42.998	4.43152	0.157358	24.5294	0.867344		18	0.2	0.000184222	7.70776e-05	0.000164502	9.262e-05	0.00172961	7.50773e-05	0.148188	0.000333166	0.717668	0.00150878
