# Supplementary material
Source: publisher figshare collection journal article supplement (https://gsapubs.figshare.com/ndownloader/files/23303600)

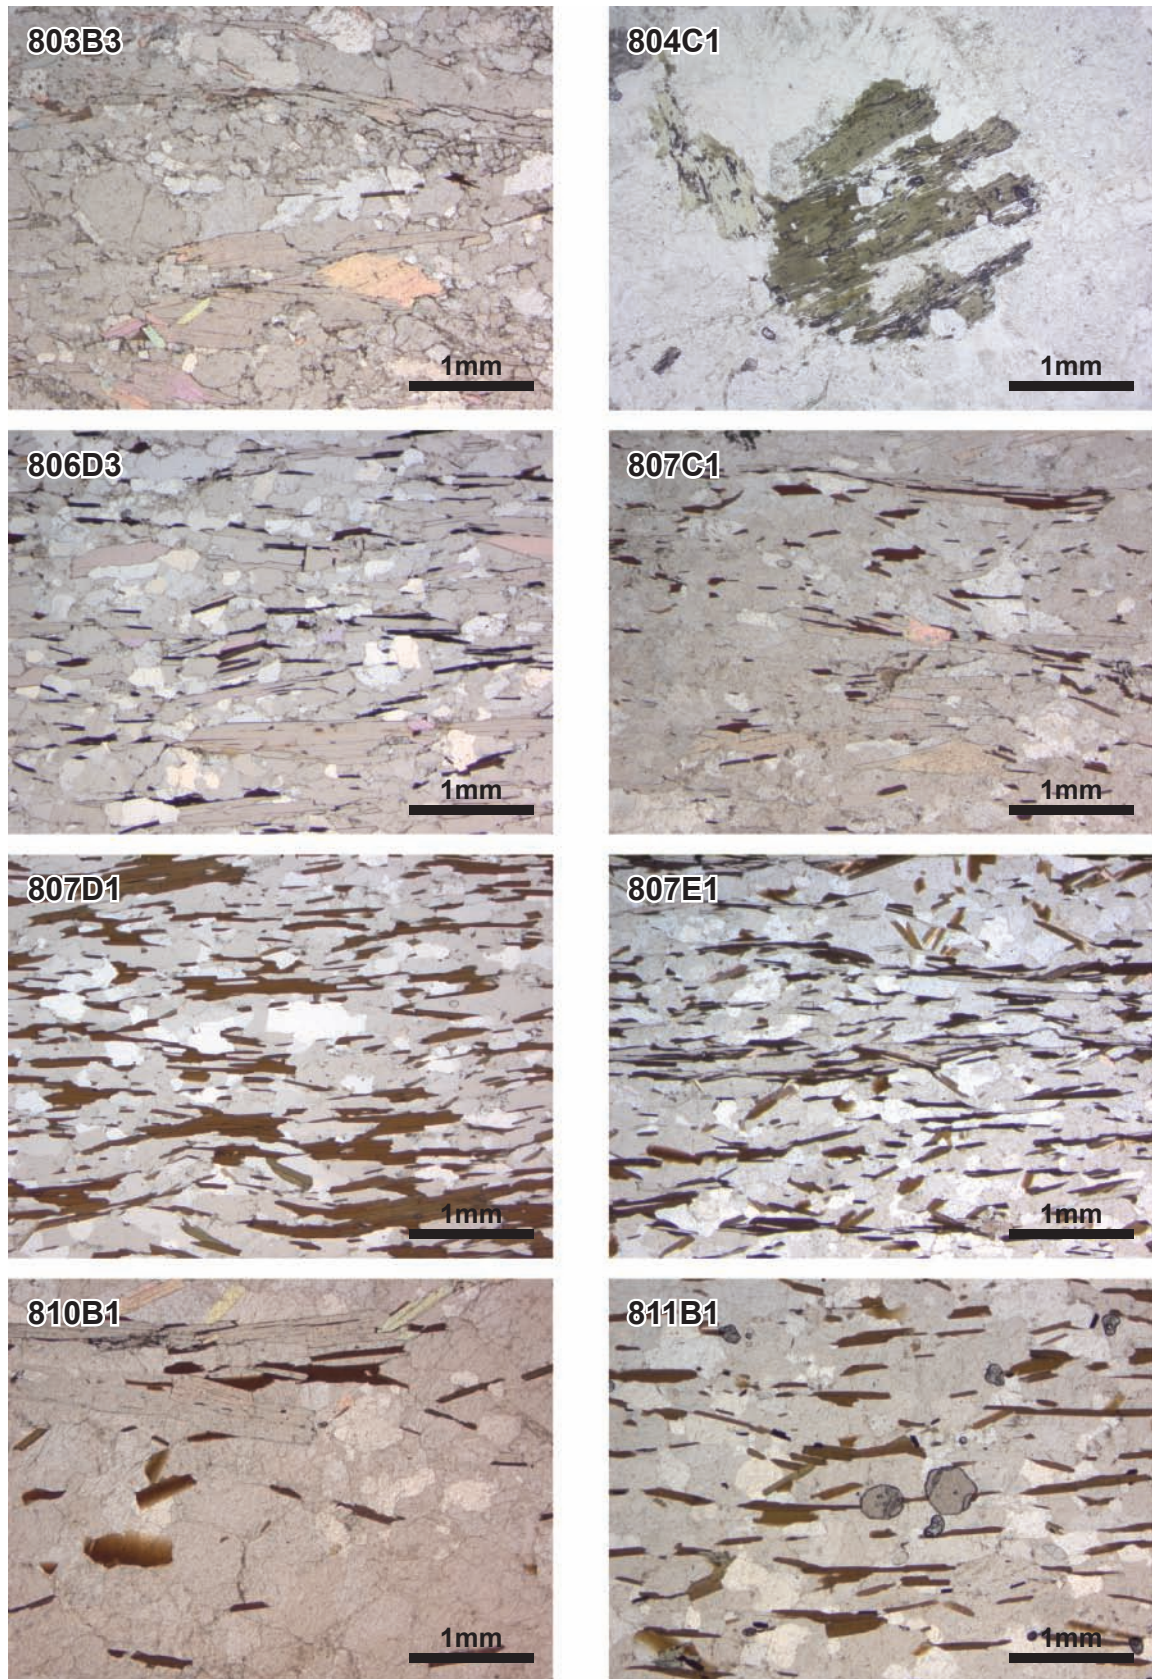

Figure S1

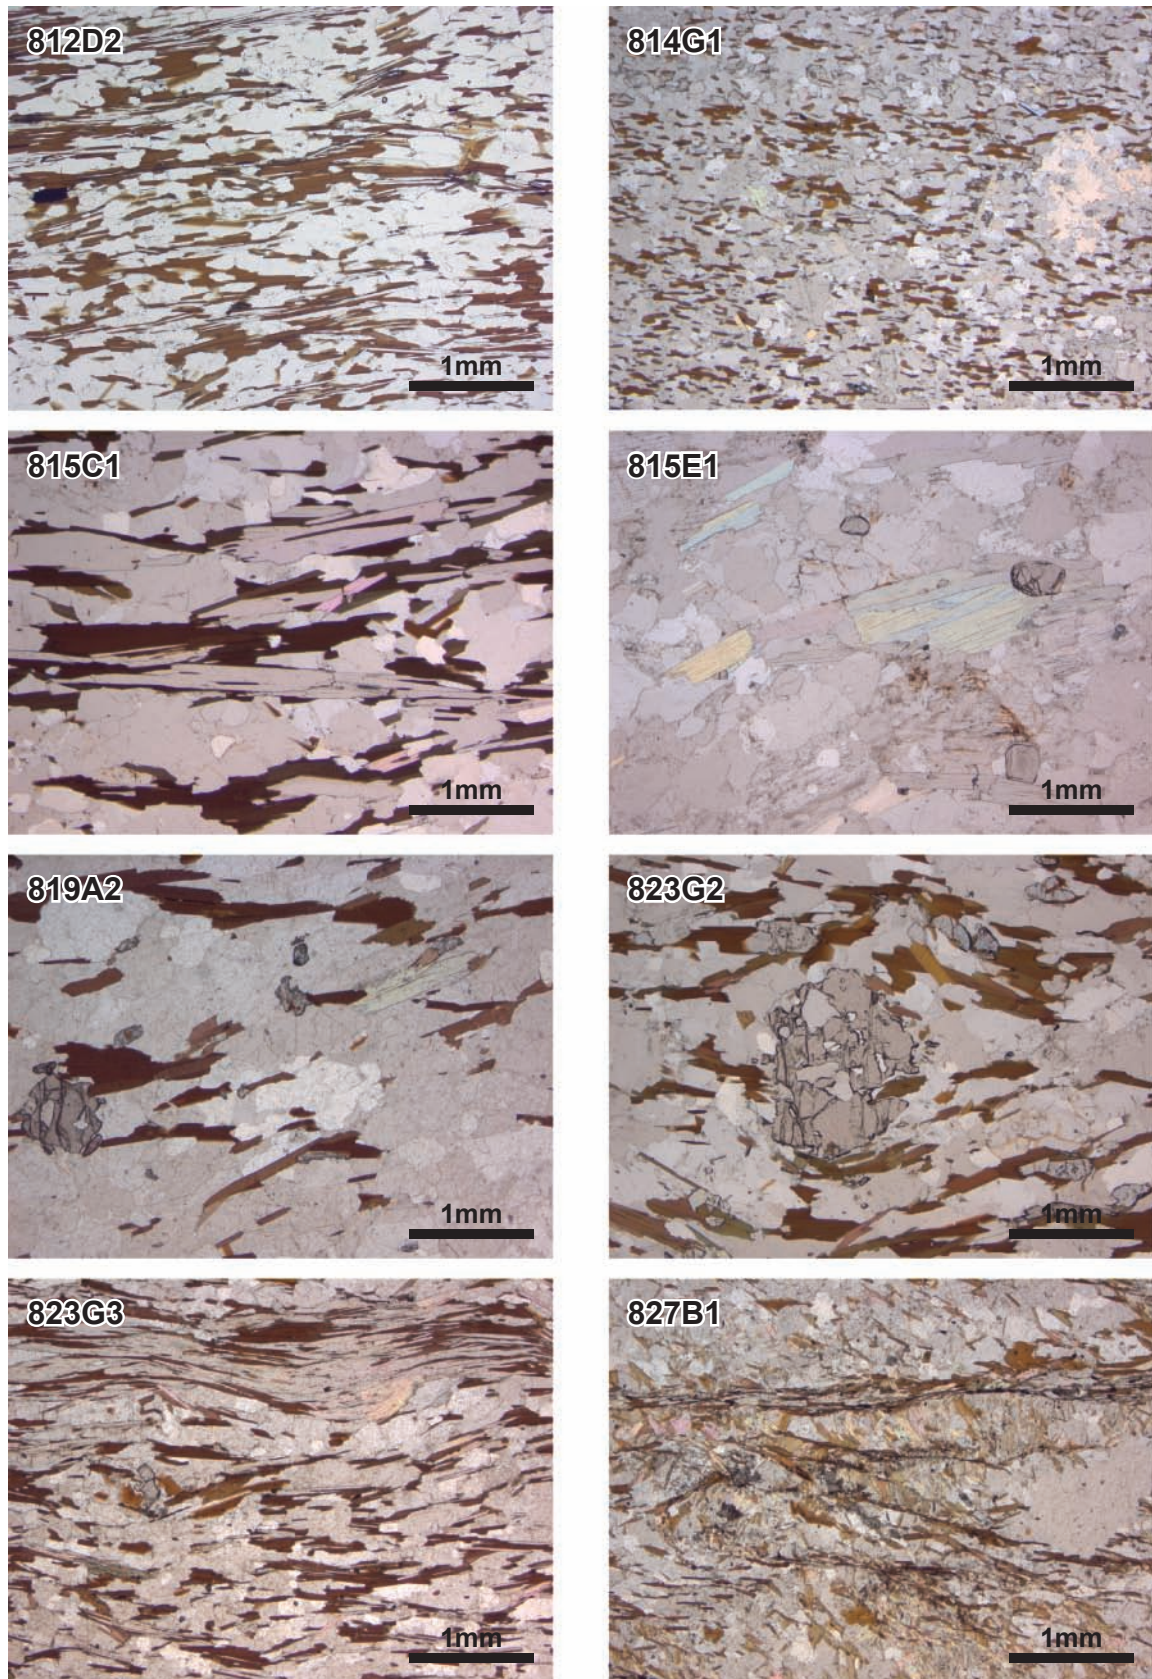

Figure S1 (continued)

Supplement: Supplementary file 1 [file 23303600 › DR Figure S1.pdf]
